# Supplementary material for: Magnetically-induced current density investigation in carbohelicenes and azahelicenes
Source: Royal Society of Chemistry journal article supplement (doi:10.1039/c9cp02071c), 2019-01-01
Supplement: c9cp02071c1.pdf [file c9cp02071c1.pdf]

## Supplementary materials

---

### Magnetically-induced current density investigation in carbohelicenes and azahelicenes

Emna CHERNI,<sup>a,b,c</sup> Benoît CHAMPAGNE,<sup>c</sup> Sameh AYADI,<sup>b</sup> and Vincent LIÉGEOIS<sup>c,\*</sup>

<sup>[a]</sup>*Chemistry Department, Faculty of Sciences of Tunis, University of Tunis El Manar, B.P 248 El Manar II, 2092 Tunis, Tunisia*

<sup>[b]</sup>*Laboratory of Materials Molecules and Applications, Preparatory Institute for Scientific and Technical Studies, Carthage University, B.P:51, La Marsa, 2075 Tunis, Tunisia*

<sup>[c]</sup>*Laboratory of Theoretical Chemistry, Unit of Theoretical and Structural Physical Chemistry, Namur Institute of Structured Matter, University of Namur, Rue de Bruxelles, 61, 5000 Namur, Belgium.*

E-mail : [vincent.liegeois@unamur.be](mailto:vincent.liegeois@unamur.be)

---

# Table of Contents

|                                                                                                                          |            |
|--------------------------------------------------------------------------------------------------------------------------|------------|
| <b>I- Current density, NICS, and BLA analysis in carbohelicenes</b>                                                      |            |
| <b>Table S1:</b> Induced current (in nA/T), BLA, NICS(0), and NICS <sub>zz</sub> (0) of [n]-helicenes                    | <b>S3</b>  |
| <b>Figure S1:</b> Local normal magnetic field for the successive rings of [n]-helicenes                                  | <b>S6</b>  |
| <b>II- Comparison of calculated and measured <sup>1</sup>H and <sup>13</sup>C NMR chemical shifts</b>                    |            |
| <b>Table S2:</b> Experimental and calculated <sup>1</sup> H and <sup>13</sup> C NMR chemical shifts of [6]-helicene      | <b>S7</b>  |
| <b>Table S3:</b> Experimental and calculated <sup>1</sup> H and <sup>13</sup> C NMR chemical shifts of extended helicene | <b>S7</b>  |
| <b>III- Current density, BLA, and NICS analysis of hexa-peri-hexabenz[7]helicene (extended helicene)</b>                 |            |
| <b>Table S4:</b> Induced current (in nA/T), BLA, NICS(0), and NICS <sub>zz</sub> (0) of extended helicene                | <b>S8</b>  |
| <b>Figure S2:</b> Local magnetic field for the successive rings of the extended helicene                                 | <b>S8</b>  |
| <b>IV- Current density and NICS analysis of azahelicenes</b>                                                             |            |
| <b>Table S5:</b> Induced current (in nA/T), NICS(0), and NICS <sub>zz</sub> (0) of azahelicenes                          | <b>S9</b>  |
| <b>V- Cartesian coordinates of the molecules</b>                                                                         | <b>S10</b> |

## I- Current density, NICS and BLA analysis in carbohelicenes

**Table S1:** Induced current (in nA/T), BLA, NICS(0), and NICS<sub>zz</sub>(0) of [n]-helicenes

| Helicene      | Ring | $J_{middle}$ (nA/T) | $\bar{J}$ (nA/T) | BLA (Å) | NICS(0) (ppm) | NICS <sub>zz</sub> (0) (ppm) |
|---------------|------|---------------------|------------------|---------|---------------|------------------------------|
| [20]-helicene | A    | 12.07               | 12.29            | 0.0195  | -10.27        | -21.46                       |
|               | B    | 11.14               | 11.45            | 0.0389  | -7.34         | -12.05                       |
|               | C    | 12.01               | 12.08            | 0.0334  | -7.29         | -12.53                       |
|               | D    | 11.65               | 11.74            | 0.0347  | -6.37         | -10.81                       |
|               | E    | 10.86               | 11.03            | 0.0356  | -5.75         | -8.95                        |
|               | F    | 11.61               | 11.57            | 0.0351  | -6.72         | -11.39                       |
|               | G    | 11.35               | 11.56            | 0.0356  | -7.51         | -13.95                       |
|               | H    | 11.85               | 12.03            | 0.0356  | -7.65         | -14.68                       |
|               | I    | 12.21               | 12.31            | 0.0359  | -7.26         | -14.24                       |
|               | J    | 11.79               | 12.07            | 0.0358  | -7.11         | -13.54                       |
|               | K    | 11.80               | 12.08            | 0.0358  | -7.13         | -13.60                       |
|               | L    | 12.26               | 12.33            | 0.0359  | -7.23         | -14.21                       |
|               | M    | 11.90               | 12.06            | 0.0357  | -7.59         | -14.57                       |
|               | N    | 11.29               | 11.54            | 0.0356  | -7.41         | -13.91                       |
|               | O    | 11.59               | 11.53            | 0.0351  | -6.73         | -11.41                       |
|               | P    | 10.77               | 11.03            | 0.0356  | -5.78         | -8.85                        |
|               | Q    | 11.61               | 11.71            | 0.0347  | -6.36         | -10.87                       |
|               | R    | 11.98               | 12.09            | 0.0334  | -7.30         | -12.46                       |
|               | S    | 11.25               | 11.50            | 0.0389  | -7.40         | -12.18                       |
|               | T    | 12.18               | 12.30            | 0.0195  | -10.33        | -21.46                       |
| [14]-helicene | A    | 12.16               | 12.27            | 0.0199  | -9.94         | -20.47                       |
|               | B    | 11.16               | 11.39            | 0.0389  | -7.10         | -10.91                       |
|               | C    | 11.92               | 12.09            | 0.0335  | -6.92         | -10.68                       |
|               | D    | 11.44               | 11.72            | 0.0347  | -6.03         | -8.85                        |
|               | E    | 10.54               | 10.92            | 0.0362  | -5.23         | -6.67                        |
|               | F    | 11.57               | 11.61            | 0.0354  | -6.36         | -9.32                        |
|               | G    | 11.17               | 11.44            | 0.0359  | -7.10         | -11.86                       |
|               | H    | 11.16               | 11.42            | 0.0359  | -7.07         | -11.82                       |
|               | I    | 11.54               | 11.57            | 0.0354  | -6.33         | -9.32                        |
|               | J    | 10.63               | 10.94            | 0.0362  | -5.22         | -6.62                        |
|               | K    | 11.42               | 11.72            | 0.0347  | -6.05         | -8.86                        |
|               | L    | 11.95               | 12.11            | 0.0335  | -6.93         | -10.68                       |
|               | M    | 11.12               | 11.39            | 0.0389  | -7.11         | -10.91                       |
|               | N    | 12.17               | 12.28            | 0.0199  | -9.94         | -20.44                       |
| [13]-helicene | A    | 12.14               | 12.25            | 0.0197  | -9.89         | -20.18                       |
|               | B    | 11.13               | 11.53            | 0.0390  | -6.93         | -10.41                       |
|               | C    | 11.94               | 12.11            | 0.0333  | -6.84         | -10.33                       |
|               | D    | 11.45               | 11.70            | 0.0350  | -5.94         | -8.62                        |
|               | E    | 10.62               | 10.98            | 0.0359  | -5.25         | -6.57                        |
|               | F    | 11.32               | 11.42            | 0.0350  | -6.42         | -9.14                        |
|               | G    | 10.65               | 10.85            | 0.0360  | -6.69         | -10.61                       |
|               | H    | 11.32               | 11.42            | 0.0350  | -6.42         | -9.14                        |
|               | I    | 10.62               | 10.98            | 0.0359  | -5.25         | -6.57                        |
|               | J    | 11.44               | 11.70            | 0.0351  | -5.94         | -8.61                        |

|               |               |       |       |        |        |        |        |
|---------------|---------------|-------|-------|--------|--------|--------|--------|
|               | K             | 11.95 | 12.11 | 0.0333 | -6.84  | -10.33 |        |
|               | L             | 11.14 | 11.53 | 0.0389 | -6.93  | -10.41 |        |
|               | M             | 12.15 | 12.25 | 0.0197 | -9.89  | -20.18 |        |
| [12]-helicene | A             | 12.15 | 12.22 | 0.0200 | -9.73  | -19.62 |        |
|               | B             | 11.21 | 11.61 | 0.0388 | -6.91  | -10.25 |        |
|               | C             | 11.69 | 11.98 | 0.0336 | -6.60  | -9.86  |        |
|               | D             | 11.49 | 11.78 | 0.0349 | -6.03  | -8.82  |        |
|               | E             | 10.80 | 10.98 | 0.0359 | -5.41  | -6.58  |        |
|               | F             | 10.74 | 10.80 | 0.0353 | -6.06  | -8.07  |        |
|               | G             | 10.74 | 10.80 | 0.0353 | -6.06  | -8.08  |        |
|               | H             | 10.80 | 10.98 | 0.0359 | -5.41  | -6.58  |        |
|               | I             | 11.49 | 11.78 | 0.0349 | -6.03  | -8.82  |        |
|               | J             | 11.69 | 11.98 | 0.0336 | -6.60  | -9.86  |        |
|               | K             | 11.21 | 11.61 | 0.0388 | -6.91  | -10.25 |        |
|               | L             | 12.15 | 12.22 | 0.0200 | -9.73  | -19.62 |        |
|               | [11]-helicene | A     | 12.08 | 12.13  | 0.0200 | -9.52  | -19.10 |
|               |               | B     | 10.99 | 11.39  | 0.0390 | -6.73  | -9.82  |
| C             |               | 11.85 | 12.09 | 0.0335 | -6.69  | -9.83  |        |
| D             |               | 11.42 | 11.67 | 0.0349 | -6.02  | -8.25  |        |
| E             |               | 10.26 | 10.46 | 0.0360 | -5.05  | -5.46  |        |
| F             |               | 10.85 | 10.79 | 0.0346 | -5.35  | -5.22  |        |
| G             |               | 10.26 | 10.46 | 0.0360 | -5.06  | -5.46  |        |
| H             |               | 11.43 | 11.68 | 0.0349 | -6.02  | -8.25  |        |
| I             |               | 11.85 | 12.09 | 0.0335 | -6.69  | -9.83  |        |
| J             |               | 10.98 | 11.39 | 0.0390 | -6.73  | -9.82  |        |
| K             |               | 12.08 | 12.13 | 0.0200 | -9.52  | -19.10 |        |
| [10]-helicene | A             | 12.02 | 12.12 | 0.0200 | -9.50  | -18.86 |        |
|               | B             | 11.09 | 11.44 | 0.0389 | -6.78  | -9.82  |        |
|               | C             | 11.90 | 11.94 | 0.0333 | -6.82  | -9.61  |        |
|               | D             | 11.08 | 11.16 | 0.0348 | -5.76  | -7.06  |        |
|               | E             | 10.24 | 10.28 | 0.0353 | -4.28  | -2.50  |        |
|               | F             | 10.24 | 10.28 | 0.0353 | -4.28  | -2.50  |        |
|               | G             | 11.08 | 11.16 | 0.0348 | -5.76  | -7.06  |        |
|               | H             | 11.90 | 11.95 | 0.0333 | -6.82  | -9.61  |        |
|               | I             | 11.09 | 11.44 | 0.0389 | -6.78  | -9.82  |        |
|               | J             | 12.02 | 12.12 | 0.0200 | -9.50  | -18.86 |        |
|               | [9]-helicene  | A     | 12.03 | 12.08  | 0.0198 | -9.57  | -18.63 |
| B             |               | 11.14 | 11.39 | 0.0389 | -6.87  | -9.55  |        |
| C             |               | 11.29 | 11.40 | 0.0333 | -6.41  | -8.08  |        |
| D             |               | 11.09 | 11.11 | 0.0341 | -5.09  | -4.70  |        |
| E             |               | 9.86  | 9.91  | 0.0360 | -3.43  | -0.14  |        |
| F             |               | 11.09 | 11.13 | 0.0341 | -5.10  | -4.73  |        |
| G             |               | 11.33 | 11.42 | 0.0333 | -6.42  | -8.06  |        |
| H             |               | 11.11 | 11.41 | 0.0389 | -6.85  | -9.52  |        |
| I             |               | 12.01 | 12.08 | 0.0198 | -9.56  | -18.61 |        |
| [8]-helicene  | A             | 12.08 | 12.07 | 0.0208 | -9.39  | -18.46 |        |
|               | B             | 10.81 | 10.97 | 0.0385 | -6.62  | -8.49  |        |
|               | C             | 11.36 | 11.45 | 0.0323 | -5.81  | -5.67  |        |
|               | D             | 10.70 | 10.85 | 0.0345 | -4.16  | -2.17  |        |

|              |   |       |       |        |       |        |
|--------------|---|-------|-------|--------|-------|--------|
|              | E | 10.70 | 10.85 | 0.0345 | -4.16 | -2.17  |
|              | F | 11.36 | 11.45 | 0.0323 | -5.81 | -5.68  |
|              | G | 10.81 | 10.97 | 0.0385 | -6.62 | -8.49  |
|              | H | 12.08 | 12.07 | 0.0208 | -9.39 | -18.46 |
| [7]-helicene | A | 11.96 | 12.01 | 0.0202 | -9.31 | -17.55 |
|              | B | 10.83 | 10.92 | 0.0381 | -5.85 | -5.51  |
|              | C | 10.91 | 11.04 | 0.0330 | -4.75 | -3.10  |
|              | D | 11.78 | 11.88 | 0.0337 | -4.91 | -4.33  |
|              | E | 10.91 | 11.04 | 0.0330 | -4.75 | -3.10  |
|              | F | 10.83 | 10.92 | 0.0381 | -5.85 | -5.51  |
|              | G | 11.96 | 12.01 | 0.0202 | -9.31 | -17.55 |
| [6]-Helicene | A | 12.00 | 11.99 | 0.0200 | -8.53 | -14.84 |
|              | B | 10.66 | 10.75 | 0.0387 | -5.09 | -3.55  |
|              | C | 11.99 | 12.11 | 0.0316 | -5.38 | -5.50  |
|              | D | 11.99 | 12.11 | 0.0316 | -5.38 | -5.50  |
|              | E | 10.66 | 10.75 | 0.0387 | -5.09 | -3.55  |
|              | F | 12.00 | 11.99 | 0.0200 | -8.53 | -14.84 |

**Figure S1:** Local normal magnetic field for the successive rings of [n]-helicenes where n = (6, 7, 8, 9, 10, 11, 12, 13, 14 and 20) as obtained from M06/6-311G\* optimized geometries.

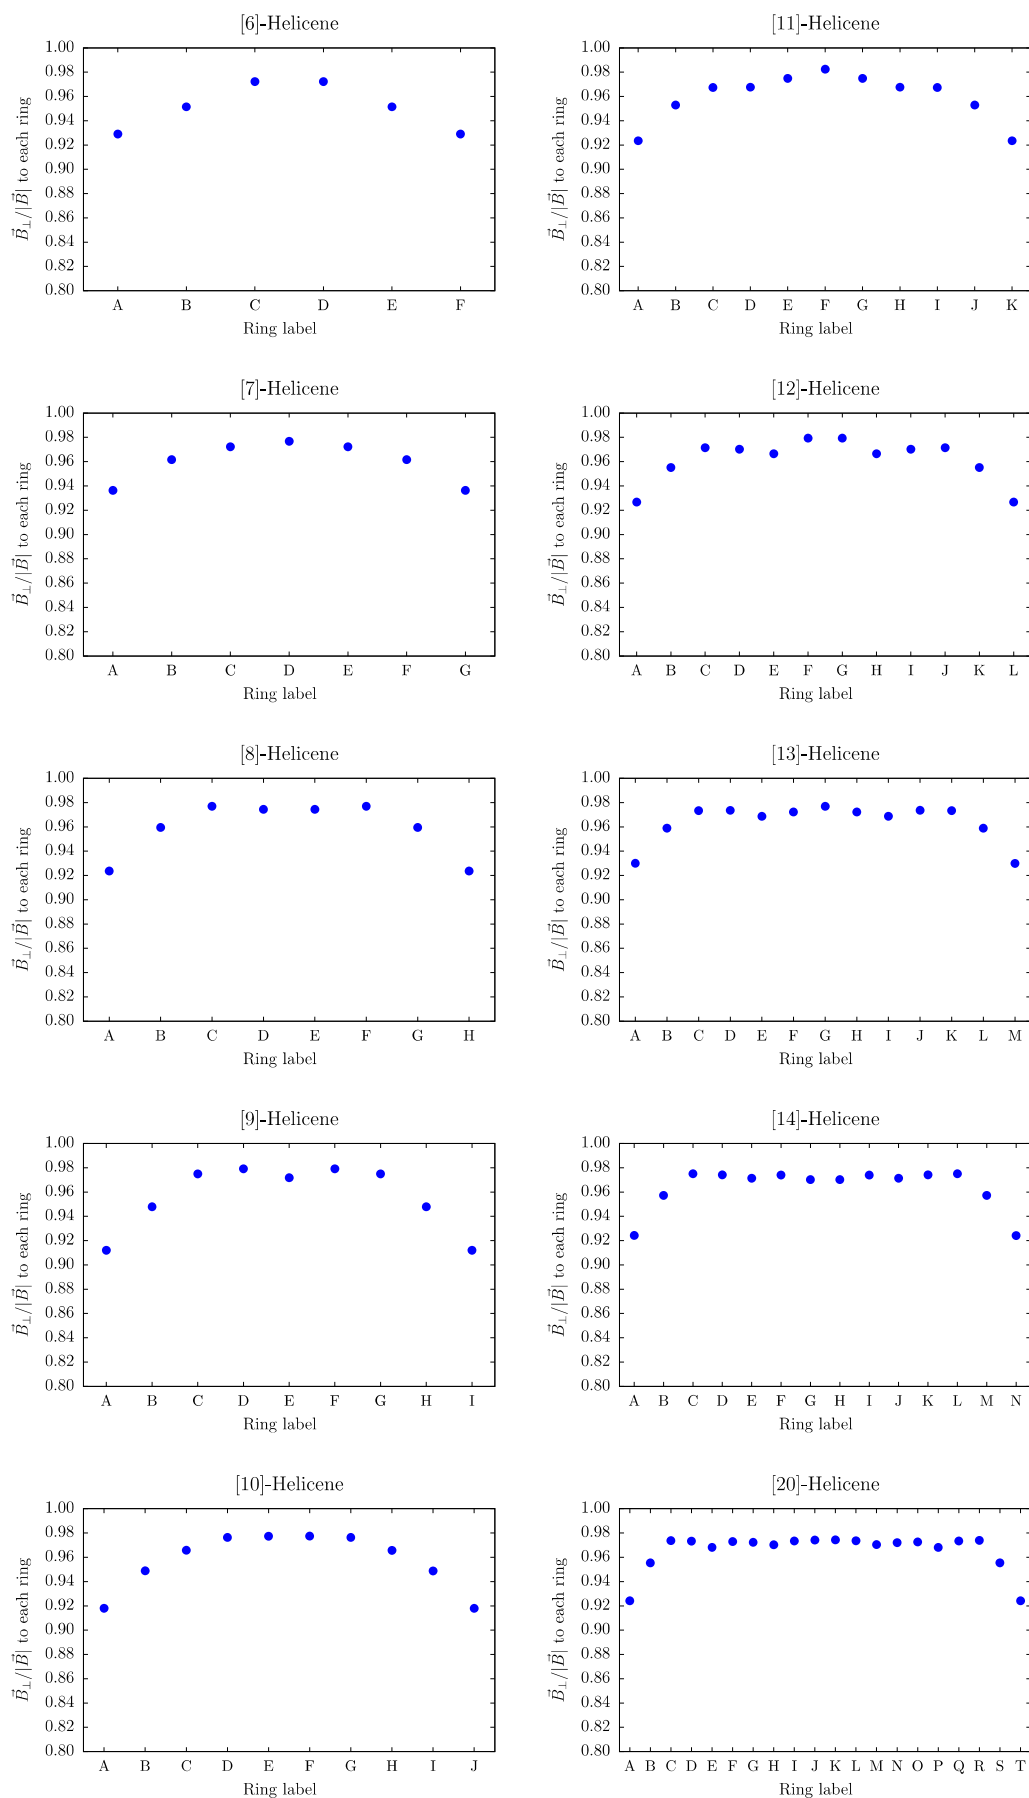

## II- Comparison of calculated and measured $^1\text{H}$ and $^{13}\text{C}$ NMR chemical shifts

**Table S2:** Experimental and calculated  $^1\text{H}$  and  $^{13}\text{C}$  NMR chemical shifts of [6]-helicene

| $^1\text{H}$ NMR chemical shifts                                           |                                                                                                                                                                                                                                                                                                                                                                             |
|----------------------------------------------------------------------------|-----------------------------------------------------------------------------------------------------------------------------------------------------------------------------------------------------------------------------------------------------------------------------------------------------------------------------------------------------------------------------|
| M06/6-311G*/IEFPCM(chloroform)//<br>B3LYP/6-311+G(2d,p)/IEFPCM(chloroform) | H <sub>2</sub> (6.89), H <sub>3</sub> (7.46), H <sub>1</sub> (7.77), H <sub>4</sub> (8.21), H <sub>5</sub> (8.30), H <sub>6</sub> (8.36),<br>H <sub>7</sub> (8.36), H <sub>8</sub> (8.42)                                                                                                                                                                                   |
| Experimental                                                               | H <sub>2</sub> (6.68), H <sub>3</sub> (7.26), H <sub>1</sub> (7.43), H <sub>4</sub> (7.94), H <sub>5</sub> (8.06), H <sub>6</sub> (8.10),<br>H <sub>7</sub> (8.15), H <sub>8</sub> (8.18)                                                                                                                                                                                   |
| $^{13}\text{C}$ NMR chemical shifts                                        |                                                                                                                                                                                                                                                                                                                                                                             |
| M06/6-311G*/IEFPCM(chloroform)//<br>B3LYP/6-311+G(2d,p)/IEFPCM(chloroform) | C <sub>2</sub> (129.28), C <sub>1c</sub> (129.64), C <sub>3</sub> (130.23), C <sub>6</sub> (131.60), C <sub>7</sub><br>(132.16), C <sub>8</sub> (132.29), C <sub>4</sub> (132.72), C <sub>5</sub> (133.07), C <sub>1b</sub> (133.19),<br>C <sub>1</sub> (133.83), C <sub>1a</sub> (135.08), C <sub>6a</sub> (137.03), C <sub>4a</sub> (137.55), C <sub>8a</sub><br>(137.62) |
| Experimental                                                               | C <sub>1c</sub> (123.17), C <sub>2</sub> (124.97), C <sub>3</sub> (125.98), C <sub>6</sub> (126.47), C <sub>1</sub><br>(126.75), C <sub>8</sub> (127.23), C <sub>1b</sub> (127.27), C <sub>7</sub> (127.65), C <sub>4</sub> (128.08),<br>C <sub>5</sub> (128.24), C <sub>1a</sub> (129.32), C <sub>8a</sub> (130.01), C <sub>6a</sub> (131.14), C <sub>4a</sub><br>(131.63) |

**Table S3:** Experimental and calculated  $^1\text{H}$  and  $^{13}\text{C}$  NMR chemical shifts of extended helicene

| $^1\text{H}$ NMR chemical shifts                                           |                                                                                                                                                                                                                                                                                                                                                                                                                                                                                                                                                                                                                                       |
|----------------------------------------------------------------------------|---------------------------------------------------------------------------------------------------------------------------------------------------------------------------------------------------------------------------------------------------------------------------------------------------------------------------------------------------------------------------------------------------------------------------------------------------------------------------------------------------------------------------------------------------------------------------------------------------------------------------------------|
| M06/6-311G*/IEFPCM(chloroform)//<br>B3LYP/6-311+G(2d,p)/IEFPCM(chloroform) | H <sub>b</sub> (6.34), H <sub>c</sub> (6.97), H <sub>d</sub> (7.34), H <sub>e</sub> (7.60), H <sub>a</sub> (7.72), H <sub>h</sub> (7.91),<br>H <sub>k</sub> (7.94), H <sub>f</sub> (8.38), H <sub>g</sub> (8.58), H <sub>l</sub> (8.78), H <sub>i</sub> (8.88), H <sub>j</sub> (8.90)                                                                                                                                                                                                                                                                                                                                                 |
| Experimental                                                               | H <sub>b</sub> (6.22), H <sub>c</sub> (6.69), H <sub>d</sub> (7.12), H <sub>e</sub> (7.27), H <sub>h</sub> (7.63), H <sub>k</sub> (7.69),<br>H <sub>a</sub> (7.80), H <sub>f</sub> (7.93), H <sub>g</sub> (8.15), H <sub>l</sub> (8.34), H <sub>i</sub> (8.47), H <sub>j</sub> (8.49)                                                                                                                                                                                                                                                                                                                                                 |
| $^{13}\text{C}$ NMR chemical shifts                                        |                                                                                                                                                                                                                                                                                                                                                                                                                                                                                                                                                                                                                                       |
| M06/6-311G*/IEFPCM(chloroform)//<br>B3LYP/6-311+G(2d,p)/IEFPCM(chloroform) | C <sub>f</sub> (124.97), C <sub>g</sub> (125.92), C <sub>l</sub> (126.64), C <sub>i</sub> (127.19), C <sub>j</sub><br>(127.31), C <sub>b</sub> (130.51), C <sub>e</sub> (130.62), C <sub>c</sub> (130.84), C <sub>k</sub> (131.46),<br>C <sub>h</sub> (131.48), C <sub>d</sub> (132.28), C <sub>w</sub> (133.86), C <sub>t</sub> (134.68), C <sub>x</sub><br>(135.53), C <sub>q</sub> (135.62), C <sub>a</sub> (135.63), C <sub>s</sub> (135.88), C <sub>p</sub> (136.05),<br>C <sub>n</sub> (137.02), C <sub>r</sub> (137.14), C <sub>o</sub> (137.18), C <sub>v</sub> (138.80), C <sub>m</sub><br>(139.31), C <sub>u</sub> (141.94) |
| Experimental                                                               | C <sub>f</sub> (119.90), C <sub>g</sub> (121.50), C <sub>l</sub> (122.00), C <sub>i</sub> (122.40), C <sub>j</sub><br>(122.70), C <sub>b</sub> (125.51), C <sub>e</sub> (125.54), C <sub>c</sub> (125.80), C <sub>d</sub> (126.70),<br>C <sub>h</sub> (126.89), C <sub>k</sub> (126.92), C <sub>t</sub> (127.20), C <sub>w</sub> (128.00), C <sub>a</sub><br>(128.50), C <sub>x</sub> (129.70), C <sub>s</sub> (130.10), C <sub>q</sub> (130.20), C <sub>p</sub> (130.30),<br>C <sub>n</sub> (131.03), C <sub>o</sub> (131.09), C <sub>r</sub> (131.09), C <sub>v</sub> (131.09), C <sub>u</sub><br>(133.50), C <sub>m</sub> (134.00) |

### III- Current density, BLA and NICS analysis of hexa-peri-hexabenzo [7]helicene (extended helicene)

**Table S4:** Induced current (in nA/T), BLA, NICS(0), and NICS<sub>zz</sub>(0) of extended helicene

| Ring | $\bar{J}$ (nA/T) | $\bar{J}_{para}$ (nA/T) | $\bar{J}_{dia}$ (nA/T) | BLA (Å) | NICS(0) (ppm) | NICS <sub>zz</sub> (0) (ppm) |
|------|------------------|-------------------------|------------------------|---------|---------------|------------------------------|
| A    | 9.06             | -5.46                   | 14.52                  | 0.0163  | -6.81         | -8.21                        |
| H    | 9.98             | -7.01                   | 17.00                  | 0.0216  | -6.26         | -5.11                        |
| B    | 2.47             | -7.40                   | 9.87                   | 0.0053  | 5.13          | 29.24                        |
| I    | 10.85            | -8.13                   | 18.98                  | 0.0099  | -5.82         | -3.57                        |
| C    | 6.77             | -5.95                   | 12.73                  | 0.0330  | -1.08         | 10.95                        |
| J    | 9.94             | -8.42                   | 18.36                  | 0.0107  | -4.62         | -0.48                        |
| D    | 0.65             | -7.95                   | 8.60                   | 0.0132  | 7.42          | 35.36                        |
| K    | 9.94             | -8.42                   | 18.36                  | 0.0107  | -4.62         | -0.47                        |
| E    | 6.76             | -5.96                   | 12.72                  | 0.0330  | -1.07         | 10.97                        |
| L    | 10.87            | -8.12                   | 18.99                  | 0.0099  | -5.82         | -3.58                        |
| F    | 2.50             | -7.39                   | 9.89                   | 0.0053  | 5.12          | 29.21                        |
| M    | 9.99             | -7.03                   | 17.02                  | 0.0216  | -6.27         | -5.11                        |
| G    | 9.05             | -5.43                   | 14.48                  | 0.0163  | -6.80         | -8.24                        |

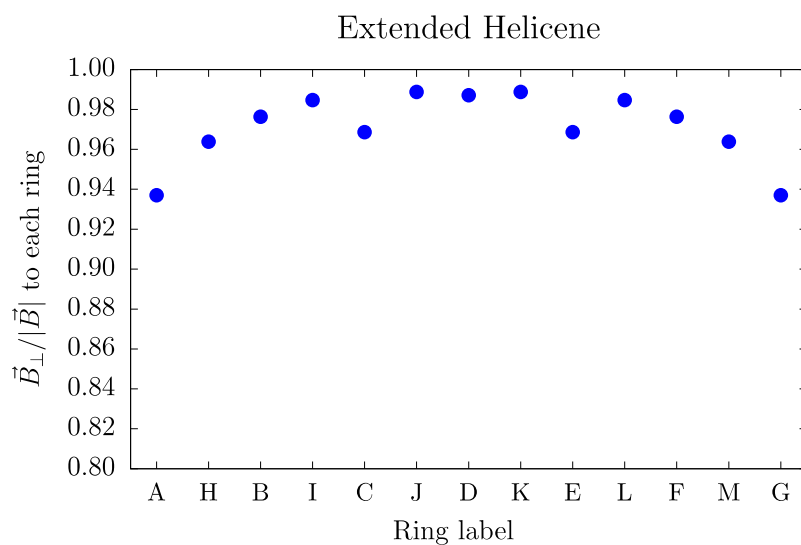

**Figure S2:** Local normal magnetic field for the successive rings of the extended helicene as obtained from M06/6-311G\* optimized geometries.



#### IV- Current density and NICS analysis of azahelicenes

**Table S5:** Induced current (in nA/T), NICS(0), and NICS<sub>zz</sub>(0) of azahelicenes

| Helicene                  | Ring | $\bar{J}$ (nA/T) | $\bar{J}_{para}$ (nA/T) | $\bar{J}_{dia}$ (nA/T) | NICS(0) (ppm) | NICS <sub>zz</sub> (0) (ppm) |
|---------------------------|------|------------------|-------------------------|------------------------|---------------|------------------------------|
| mono-aza-[7]-<br>helicene | A    | 13.15            | -4.55                   | 17.71                  | -9.54         | -18.75                       |
|                           | B    | 11.20            | -4.67                   | 15.87                  | -5.51         | -5.48                        |
|                           | C    | 12.28            | -4.31                   | 16.59                  | -8.01         | -9.13                        |
|                           | D    | 11.03            | -4.33                   | 15.36                  | -9.20         | -2.07                        |
|                           | E    | 12.28            | -4.31                   | 16.59                  | -8.01         | -9.12                        |
|                           | F    | 11.20            | -4.67                   | 15.87                  | -5.51         | -5.48                        |
|                           | G    | 13.15            | -4.55                   | 17.71                  | -9.54         | -18.75                       |
| tri-aza-[7]-helicene      | A    | 11.91            | -4.38                   | 16.29                  | -9.20         | -14.24                       |
|                           | B    | 10.03            | -4.70                   | 14.73                  | -8.50         | 0.47                         |
|                           | C    | 12.87            | -4.36                   | 17.23                  | -9.81         | -11.63                       |
|                           | D    | 11.05            | -4.69                   | 15.74                  | -9.22         | 1.14                         |
|                           | E    | 12.88            | -4.38                   | 17.26                  | -9.83         | -11.61                       |
|                           | F    | 10.05            | -4.70                   | 14.74                  | -8.56         | 0.40                         |
|                           | G    | 11.95            | -4.38                   | 16.33                  | -9.17         | -14.26                       |
| tetra-aza-[7]-helicene    | A    | 10.91            | -4.58                   | 15.49                  | -12.09        | -10.77                       |
|                           | B    | 11.54            | -4.39                   | 15.93                  | -8.97         | -9.99                        |
|                           | C    | 10.77            | -4.80                   | 15.57                  | -9.52         | 0.02                         |
|                           | D    | 12.27            | -4.55                   | 16.82                  | -8.92         | -9.26                        |
|                           | E    | 10.77            | -4.80                   | 15.57                  | -9.52         | 0.02                         |
|                           | F    | 11.54            | -4.39                   | 15.93                  | -8.97         | -9.99                        |
|                           | G    | 10.91            | -4.58                   | 15.49                  | -12.09        | -10.77                       |

**V- Cartesian coordinates and electronic energy of the molecules after geometry optimization at the M06/6-311G\* level of approximation**

**1) [6]-helicene E = -999.849817 hartree**

|   |               |               |               |
|---|---------------|---------------|---------------|
| C | -2.9456001349 | -2.5045962091 | 0.6654056337  |
| C | -2.0172517269 | -3.1433857002 | 1.4454714274  |
| C | -1.1764629700 | 3.5872766528  | -0.3549648941 |
| H | -1.1346982248 | 4.6744922404  | -0.3972797147 |
| H | -3.8761495496 | -3.0016077481 | 0.3937125227  |
| C | 2.0172558386  | -3.1433945268 | -1.4454470588 |
| C | 2.9456034211  | -2.5045981247 | -0.6653862446 |
| C | 2.7390006574  | -1.1823159821 | -0.2254627532 |
| C | 3.7670755852  | -0.4785319374 | 0.4645163557  |
| C | 1.2824563927  | 0.8018007740  | 0.0044305686  |
| C | 2.3971920740  | 1.5169823507  | 0.4873067238  |
| C | 3.6240837642  | 0.8379619135  | 0.7434448098  |
| C | 2.3099069178  | 2.9183905730  | 0.6866096693  |
| H | 3.1924056448  | 3.4510853092  | 1.0372826906  |
| C | 0.0000000000  | 1.4625001543  | 0.0000000000  |
| H | 4.6933639328  | -1.0020745570 | 0.6963661995  |
| H | 3.8761534761  | -3.0016062664 | -0.3936891595 |
| H | 4.4418108672  | 1.4060075871  | 1.1846999678  |
| C | 1.1764610491  | 3.5872803782  | 0.3549304515  |
| C | 0.0000000000  | 2.8796421697  | 0.0000000000  |
| C | -1.2824563239 | 0.8017995304  | -0.0044359317 |
| H | 1.1346945788  | 4.6744963786  | 0.3972337784  |
| C | -2.3099108549 | 2.9183823125  | -0.6866328208 |
| C | -2.3971943071 | 1.5169773129  | -0.4873157272 |
| C | -3.6240858968 | 0.8379531979  | -0.7434473340 |
| C | -3.7670759292 | -0.4785388892 | -0.4645106686 |
| C | -2.7389993345 | -1.1823172522 | 0.2254723800  |
| C | -1.5215122346 | -0.5218096298 | 0.5312137968  |
| H | -4.4418140105 | 1.4059952150  | -1.1847053178 |
| H | -4.6933636629 | -1.0020843785 | -0.6963563991 |
| H | -3.1924113811 | 3.4510729106  | -1.0373074720 |
| C | 1.5215126368  | -0.5218119571 | -0.5312092670 |
| C | 0.6275910906  | -1.1779941284 | -1.4022775599 |
| C | 0.8640065711  | -2.4542120774 | -1.8465907800 |
| H | 2.1900011352  | -4.1628007911 | -1.7826306387 |
| H | -0.2642092075 | -0.6597290333 | -1.7418666259 |
| H | 0.1529844707  | -2.9291557625 | -2.5187050260 |
| C | -0.6275900799 | -1.1779837829 | 1.4022873443  |
| C | -0.8640036236 | -2.4541988691 | 1.8466103066  |
| H | -2.1899959863 | -4.1627896995 | 1.7826624158  |
| H | 0.2642092117  | -0.6597145762 | 1.7418725580  |
| H | -0.1529810681 | -2.9291363894 | 2.5187284262  |

## 2) [7]-helicene

E = -1153.400930 hartree

|   |               |               |               |
|---|---------------|---------------|---------------|
| C | -0.6618651312 | 0.0507405776  | -1.9116005813 |
| C | -1.7910137106 | 0.4775010579  | -2.5644224762 |
| C | -0.6816426320 | -1.0792194448 | -1.0677407868 |
| C | -1.8787385284 | -1.8374690402 | -1.0174849276 |
| C | -3.0347973194 | -1.3598978050 | -1.6656171853 |
| C | -3.0032811017 | -0.2101267917 | -2.4108718182 |
| H | 0.2710641093  | 0.5836107916  | -2.0701140484 |
| H | -1.7395617152 | 1.3515505742  | -3.2099260937 |
| H | -3.9516404252 | -1.9427612978 | -1.5859920438 |
| H | -3.9004423819 | 0.1449985558  | -2.9126618751 |
| C | 0.4733413382  | -1.5365960341 | -0.3280280146 |
| C | 0.4806962606  | -2.8757306928 | 0.1086458705  |
| C | -0.7247552392 | -3.6355636340 | 0.0970775053  |
| C | -1.8784808297 | -3.1090550693 | -0.3770377884 |
| H | -0.6981647352 | -4.6467226185 | 0.5009904638  |
| H | -2.8071458867 | -3.6768926652 | -0.3443303626 |
| C | 1.6253450109  | -0.7224953561 | -0.0341151248 |
| C | 2.8505434451  | -1.3847858506 | 0.2120907859  |
| C | 2.8541443161  | -2.7717800899 | 0.5115504331  |
| C | 1.6905731031  | -3.4695466828 | 0.5538350959  |
| H | 3.8035017896  | -3.2495324096 | 0.7484788779  |
| H | 1.6756232119  | -4.5138039397 | 0.8621401525  |
| C | 4.0703339846  | -0.6605070879 | 0.1542228364  |
| C | 4.0703430917  | 0.6604527943  | -0.1542263845 |
| C | 2.8505626225  | 1.3847486071  | -0.2120931174 |
| C | 1.6253550494  | 0.7224748876  | 0.0341120929  |
| H | 5.0031859393  | -1.2021142055 | 0.3025749564  |
| H | 5.0032025449  | 1.2020471165  | -0.3025778425 |
| C | 2.8541829037  | 2.7717435026  | -0.5115494896 |
| C | 1.6906218245  | 3.4695269762  | -0.5538301587 |
| C | 0.4807369855  | 2.8757270256  | -0.1086414445 |
| C | 0.4733630937  | 1.5365910652  | 0.3280276553  |
| H | 3.8035470025  | 3.2494829421  | -0.7484771317 |
| H | 1.6756866656  | 4.5137854238  | -0.8621316116 |
| C | -0.7247033957 | 3.6355773503  | -0.0970687718 |
| C | -1.8784358496 | 3.1090841952  | 0.3770465013  |
| C | -1.8787115615 | 1.8374954144  | 1.0174880074  |
| C | -0.6816268837 | 1.0792279487  | 1.0677390193  |
| H | -0.6980987098 | 4.6467373402  | -0.5009780720 |
| H | -2.8070925509 | 3.6769355498  | 0.3443426914  |
| C | -3.0347767186 | 1.3599379484  | 1.6656189580  |
| C | -3.0032769265 | 0.2101624498  | 2.4108674260  |
| C | -1.7910196586 | -0.4774846835 | 2.5644128187  |
| C | -0.6618653270 | -0.0507374086 | 1.9115920563  |
| H | -3.9516112887 | 1.9428154379  | 1.5859981029  |
| H | -3.9004430275 | -0.1449522628 | 2.9126565780  |
| H | -1.7395801094 | -1.3515385672 | 3.2099117318  |
| H | 0.2710562955  | -0.5836225340 | 2.0701016075  |

3) [8]-helicene **E = -1306.951634 hartree**

|   |               |               |               |
|---|---------------|---------------|---------------|
| C | 0.0274740737  | 1.1672436975  | 2.0753660052  |
| C | 0.6879757614  | 2.2549597545  | 2.5877033154  |
| C | 0.7234409270  | 0.0205065559  | 1.6370448492  |
| C | 2.1247550351  | -0.0163795018 | 1.8526222043  |
| C | 2.7856891743  | 1.1267695098  | 2.3441951404  |
| C | 2.0867814901  | 2.2533081184  | 2.6910590596  |
| H | -1.0578332082 | 1.1829328546  | 2.0304401407  |
| H | 0.1189448688  | 3.1207050432  | 2.9195597688  |
| H | 3.8666191791  | 1.0844478691  | 2.4734057211  |
| H | 2.6070887065  | 3.1255103110  | 3.0804591425  |
| C | 0.0640911068  | -1.1430332686 | 1.0859924475  |
| C | 0.7644033548  | -2.3644474772 | 1.1169776411  |
| C | 2.1677296169  | -2.3745557462 | 1.3637169774  |
| C | 2.8360873133  | -1.2329976914 | 1.6493027154  |
| H | 2.6924734074  | -3.3268132696 | 1.3003389099  |
| H | 3.9142761432  | -1.2393087805 | 1.8027574864  |
| C | -1.2784096105 | -1.1470070349 | 0.5664677995  |
| C | -1.9821744853 | -2.3731158974 | 0.5700985849  |
| C | -1.2777578229 | -3.5904086569 | 0.7549373800  |
| C | 0.0696253728  | -3.5856729601 | 0.9214282993  |
| H | -1.8345928298 | -4.5252125558 | 0.7113747605  |
| H | 0.6297495939  | -4.5177860246 | 0.9781970705  |
| C | -3.3894047893 | -2.3801756876 | 0.3741387863  |
| C | -4.0661201782 | -1.2172937385 | 0.1991463514  |
| C | -3.3615561347 | 0.0000000000  | 0.0000000000  |
| C | -1.9495715968 | 0.0000000000  | 0.0000000000  |
| H | -3.9155493277 | -3.3321474605 | 0.4256723142  |
| H | -5.1537155140 | -1.2026676349 | 0.1485135688  |
| C | -4.0661005299 | 1.2173557898  | -0.1991508653 |
| C | -3.3893664557 | 2.3802272771  | -0.3741406188 |
| C | -1.9821358394 | 2.3731455101  | -0.5700973784 |
| C | -1.2783904543 | 1.1470253815  | -0.5664670375 |
| H | -5.1536961620 | 1.2027470221  | -0.1485193930 |
| H | -3.9154957538 | 3.3322075221  | -0.4256735805 |
| C | -1.2776992271 | 3.5904274109  | -0.7549322258 |
| C | 0.0696843189  | 3.5856705523  | -0.9214202717 |
| C | 0.7644432812  | 2.3644342478  | -1.1169696823 |
| C | 0.0641114606  | 1.1430313054  | -1.0859878595 |
| H | -1.8345194382 | 4.5252401101  | -0.7113691671 |
| H | 0.6298234829  | 4.5177747638  | -0.9781866934 |
| C | 2.1677701572  | 2.3745200479  | -1.3637068384 |
| C | 2.8361087820  | 1.2329523091  | -1.6492990217 |
| C | 2.1247562363  | 0.0163466535  | -1.8526234955 |
| C | 0.7234419272  | -0.0205174831 | -1.6370437167 |
| H | 2.6925292779  | 3.3267689721  | -1.3003267812 |
| H | 3.9142973843  | 1.2392466710  | -1.8027560259 |
| C | 2.7856700339  | -1.1268106004 | -2.3442046709 |
| C | 2.0867428549  | -2.2533362600 | -2.6910716751 |
| C | 0.6879375019  | -2.2549664169 | -2.5877101206 |
| C | 0.0274550023  | -1.1672416919 | -2.0753664921 |
| H | 3.8666003404  | -1.0845060945 | -2.4734181620 |
| H | 2.6070347198  | -3.1255451784 | -3.0804771980 |
| H | 0.1188916447  | -3.1207010797 | -2.9195684897 |
| H | -1.0578525126 | -1.1829131745 | -2.0304365740 |

4) [9]-helicene **E = -1460.502978 hartree**

|   |               |               |               |
|---|---------------|---------------|---------------|
| C | 2.1713033993  | 0.6241165712  | 1.6380665845  |
| C | 3.5438386387  | 0.6135447483  | 1.6382762392  |
| C | 1.4225802267  | -0.5637279157 | 1.4966283378  |
| C | 2.1414363783  | -1.7868266065 | 1.4694255864  |
| C | 3.5494901455  | -1.7704511701 | 1.4331735025  |
| C | 4.2457483399  | -0.5916779659 | 1.4981635550  |
| H | 1.6542654292  | 1.5684966409  | 1.7799793603  |
| H | 4.0865881918  | 1.5490251844  | 1.7555694740  |
| H | 4.0768282114  | -2.7226116106 | 1.3841145681  |
| H | 5.3333359603  | -0.5928602801 | 1.4814562451  |
| C | -0.0251315282 | -0.5958905393 | 1.4932796197  |
| C | -0.6513830567 | -1.8196108704 | 1.7998851284  |
| C | 0.1020400609  | -3.0289180019 | 1.7874303236  |
| C | 1.4359300501  | -3.0203992648 | 1.5611043634  |
| H | -0.4301470139 | -3.9654459919 | 1.9494953583  |
| H | 2.0027947907  | -3.9497586235 | 1.5220714744  |
| C | -0.8629452745 | 0.5569312007  | 1.2858647490  |
| C | -2.1591728690 | 0.5413394704  | 1.8468253378  |
| C | -2.7278917355 | -0.6889172841 | 2.2664455247  |
| C | -2.0269025434 | -1.8452475007 | 2.1485079215  |
| H | -3.7517426385 | -0.6885126699 | 2.6371536610  |
| H | -2.4843721409 | -2.8036834061 | 2.3899797379  |
| C | -2.8844654771 | 1.7556255138  | 1.9782589814  |
| C | -2.3379922998 | 2.9330156129  | 1.5803117234  |
| C | -1.1311355393 | 2.9445632862  | 0.8315002311  |
| C | -0.4850378706 | 1.7270782819  | 0.5333519902  |
| H | -3.8622029413 | 1.7256215946  | 2.4567352472  |
| H | -2.8438070933 | 3.8788631121  | 1.7683674396  |
| C | -0.5752970207 | 4.1659292391  | 0.3605142829  |
| C | 0.5748963489  | 4.1659785849  | -0.3605529155 |
| C | 1.1308474287  | 2.9446468486  | -0.8314970031 |
| C | 0.4848598919  | 1.7271037882  | -0.5333038245 |
| H | -1.0612698438 | 5.0996540558  | 0.6395601583  |
| H | 1.0607790584  | 5.0997470798  | -0.6396047574 |
| C | 2.3377329447  | 2.9331717783  | -1.5802605784 |
| C | 2.8843245360  | 1.7558278871  | -1.9781801551 |
| C | 2.1591554697  | 0.5414690395  | -1.8467310437 |
| C | 0.8629525083  | 0.5569200192  | -1.2856994023 |
| H | 2.8434524864  | 3.8790624955  | -1.7683653282 |
| H | 3.8620536922  | 1.7259347829  | -2.4566812288 |
| C | 2.7279536281  | -0.6887315852 | -2.2663770069 |
| C | 2.0270444793  | -1.8451116556 | -2.1484684766 |
| C | 0.6515269665  | -1.8195986676 | -1.7998528274 |
| C | 0.0251970917  | -0.5959310108 | -1.4932063657 |
| H | 3.7517983873  | -0.6882628771 | -2.6371066330 |
| H | 2.4845968401  | -2.8035046130 | -2.3899644500 |
| C | -0.1018115109 | -3.0289522238 | -1.7873960329 |
| C | -1.4356928094 | -3.0205134824 | -1.5610190812 |
| C | -2.1412847425 | -1.7869903234 | -1.4694158284 |
| C | -1.4225264835 | -0.5638478590 | -1.4966845629 |
| H | 0.4304208171  | -3.9654505693 | -1.9494878916 |
| H | -2.0024966311 | -3.9499078620 | -1.5219259771 |
| C | -3.5493459447 | -1.7707094298 | -1.4332174613 |
| C | -4.2456737524 | -0.5919927840 | -1.4983564612 |
| C | -3.5438468357 | 0.6132794823  | -1.6385147182 |
| C | -2.1713186978 | 0.6239536376  | -1.6382108911 |
| H | -4.0766342838 | -2.7228920163 | -1.3840474737 |
| H | -5.3332621401 | -0.5932477860 | -1.4816799336 |
| H | -4.0866877353 | 1.5486824311  | -1.7559889898 |
| H | -1.6543066098 | 1.5683577901  | -1.7800461795 |

5) [10]-helicene  $E = -1614.053054$  hartree

|   |               |               |               |
|---|---------------|---------------|---------------|
| C | -0.3349571853 | -0.2944811825 | 1.5312454281  |
| C | -1.3563760830 | -1.0216358201 | 2.1832347949  |
| C | -0.6584258339 | 1.0392227390  | 1.0864892179  |
| C | -1.6916521854 | 1.7290947064  | 1.7520532766  |
| C | -2.6163619762 | 1.0036291950  | 2.5494955301  |
| C | -2.5075660098 | -0.3437848693 | 2.6676619919  |
| H | -3.4442020631 | 1.5427821422  | 3.0073927981  |
| C | 0.0000000000  | 1.7152168329  | 0.0000000000  |
| C | 0.0000000000  | 3.1241560565  | 0.0000000000  |
| C | -0.9125226649 | 3.8225035642  | 0.8368922399  |
| C | -1.7995532973 | 3.1390278465  | 1.6054198379  |
| H | -0.9263267499 | 4.9108077911  | 0.7986000139  |
| H | -2.5726571245 | 3.6611210041  | 2.1672334604  |
| C | 0.6584198754  | 1.0390692829  | -1.0863494569 |
| C | 1.6917454106  | 1.7288370923  | -1.7518709168 |
| C | 1.7996228259  | 3.1388001098  | -1.6054489215 |
| C | 0.9125282266  | 3.8223886957  | -0.8371021328 |
| H | 2.5727896305  | 3.6607998835  | -2.1672633007 |
| H | 0.9263292106  | 4.9106980557  | -0.7989625691 |
| C | 2.6165851090  | 1.0032407154  | -2.5490307908 |
| C | 2.5077702881  | -0.3441848082 | -2.6670445585 |
| C | 1.3564757006  | -1.0219350593 | -2.1827491849 |
| C | 0.3349811750  | -0.2946831340 | -1.5309760081 |
| H | 3.4445179819  | 1.5423092800  | -3.0068605357 |
| H | 3.2679968525  | -0.9235492099 | -3.1890556726 |
| H | -3.2677114936 | -0.9230633670 | 3.1898848456  |
| C | 1.2238695274  | -2.4236261479 | -2.3543201102 |
| C | -0.9492691167 | -0.9300605079 | -1.3720455018 |
| C | 0.1170765303  | -3.0694641313 | -1.9078827198 |
| C | -1.0039817910 | -2.3362101897 | -1.4396024817 |
| H | 2.0487778297  | -2.9714597604 | -2.8075761289 |
| H | 0.0414583277  | -4.1546923463 | -1.9648932456 |
| C | -2.1917884947 | -3.0244032207 | -1.0577617640 |
| C | -3.3066363140 | -2.3492484176 | -0.6947888651 |
| C | -3.3633638147 | -0.9331798329 | -0.8324651275 |
| C | -2.2058267089 | -0.2208588030 | -1.2405709581 |
| H | -2.1710848491 | -4.1135811350 | -1.0472352016 |
| H | -4.2016004293 | -2.8786736537 | -0.3703229910 |
| C | 0.9492461028  | -0.9299011991 | 1.3722063240  |
| C | 1.0039363400  | -2.3360478699 | 1.4398759288  |
| C | -0.1170812204 | -3.0692313145 | 1.9083587730  |
| C | -1.2237966279 | -2.4233163252 | 2.3548975114  |
| H | -0.0414952236 | -4.1544570847 | 1.9654448017  |
| H | -2.0486589606 | -2.9710833831 | 2.8083165113  |
| C | 2.2057911270  | -0.2207391385 | 1.2404253656  |
| C | 3.3632078609  | -0.9331020597 | 0.8320636672  |
| C | 3.3064217380  | -2.3491835617 | 0.6945338175  |
| C | 2.1916633814  | -3.0242916489 | 1.0578750132  |
| H | 4.2013014759  | -2.8786556405 | 0.3699115944  |
| H | 2.1709472578  | -4.1134705370 | 1.0474605782  |
| C | 2.3772667528  | 1.1299644384  | 1.6121742399  |
| C | 4.6923068060  | 1.0863838904  | 0.9483039610  |
| C | 4.5809771921  | -0.2475571056 | 0.6540647469  |
| H | 5.4467658892  | -0.8122997874 | 0.3096251875  |
| C | -4.5811776285 | -0.2476153807 | -0.6548497813 |
| C | -4.6924129801 | 1.0863091653  | -0.9491883749 |
| C | -3.5839381743 | 1.7681487095  | -1.4708467870 |
| C | -2.3771898898 | 1.1298325039  | -1.6124244455 |

|   |               |               |               |
|---|---------------|---------------|---------------|
| H | -5.4470634984 | -0.8123281090 | -0.3106065292 |
| H | -5.6415971375 | 1.6016902022  | -0.8205204178 |
| H | -3.6778812476 | 2.8087298834  | -1.7739928209 |
| H | -1.5457932346 | 1.6727754924  | -2.0514167041 |
| C | 3.5839863241  | 1.7682584344  | 1.4702463667  |
| H | 5.6414566938  | 1.6017532854  | 0.8193374580  |
| H | 3.6780224162  | 2.8088571611  | 1.7733034247  |
| H | 1.5459819974  | 1.6729362882  | 2.0513475830  |

**6) [11]-helicene      E = -1767.603381 hartree**

|   |               |               |               |
|---|---------------|---------------|---------------|
| C | -0.4911246865 | 0.1026134361  | 1.4704901586  |
| C | -1.5838783248 | 0.0740606488  | 2.3609639672  |
| C | -0.3514823461 | 1.2602812905  | 0.6262551669  |
| C | -0.9123874443 | 2.4742622314  | 1.0665438567  |
| C | -1.8924621414 | 2.4542742557  | 2.0963440345  |
| C | -2.2874389372 | 1.2769856475  | 2.6455251757  |
| H | -2.3612601212 | 3.3932914159  | 2.3868928567  |
| C | 0.3514665940  | 1.2602634307  | -0.6263453122 |
| C | 0.9123368496  | 2.4742432393  | -1.0666858667 |
| C | 0.4821975628  | 3.6945486470  | -0.4787977357 |
| C | -0.4822969497 | 3.6945551294  | 0.4785943904  |
| H | 0.8950917317  | 4.6282869788  | -0.8580694833 |
| H | -0.8952458069 | 4.6282961442  | 0.8577990949  |
| C | 0.4911221687  | 0.1025688989  | -1.4705444787 |
| C | 1.5838586871  | 0.0740119720  | -2.3610373111 |
| C | 2.2874047100  | 1.2769376035  | -2.6456339798 |
| C | 1.8924139280  | 2.4542365836  | -2.0964853460 |
| H | 3.1089727399  | 1.2403570170  | -3.3597131798 |
| H | 2.3611978370  | 3.3932522568  | -2.3870619235 |
| C | 1.9658984971  | -1.1545149007 | -2.9620462217 |
| C | 1.2897532860  | -2.2960991445 | -2.6775312210 |
| C | 0.0727693183  | -2.2532546926 | -1.9453214942 |
| C | -0.4229476760 | -1.0149559950 | -1.4781880995 |
| H | 2.8463142873  | -1.1683648177 | -3.6029774782 |
| H | 1.6336070388  | -3.2587979692 | -3.0538841011 |
| H | -3.1090018606 | 1.2404172215  | 3.3596110116  |
| C | -0.6453470657 | -3.4469711945 | -1.6774186520 |
| C | -1.8036435196 | -0.9599401287 | -1.0649148006 |
| C | -1.8110266159 | -3.4078247653 | -0.9835720928 |
| C | -2.4315942073 | -2.1651512856 | -0.6936460593 |
| H | -0.2140550081 | -4.3946563780 | -1.9970553136 |
| H | -2.3272441550 | -4.3252283121 | -0.7032746503 |
| C | -3.7050005637 | -2.1389910504 | -0.0542631970 |
| C | -4.3724622995 | -0.9767292123 | 0.1314265515  |
| C | -3.8822245674 | 0.2300197299  | -0.4445430217 |
| C | -2.6268489720 | 0.2312773963  | -1.1061364723 |
| H | -4.1213777145 | -3.0831294977 | 0.2952215511  |
| H | -5.3311848020 | -0.9573577280 | 0.6481549488  |
| C | 0.4229472188  | -1.0149107715 | 1.4781663662  |
| C | -0.0727779429 | -2.2532060877 | 1.9453001895  |
| C | -1.2897755221 | -2.2960469941 | 2.6774871299  |
| C | -1.9659273690 | -1.1544607076 | 2.9619773281  |
| H | -1.6336420651 | -3.2587436386 | 3.0538338240  |
| H | -2.8463605639 | -1.1683059732 | 3.6028850362  |
| C | 1.8036566644  | -0.9598941643 | 1.0649312844  |
| C | 2.4316259367  | -2.1651089991 | 0.6937038084  |
| C | 1.8110482646  | -3.4077808436 | 0.9836146757  |
| C | 0.6453468540  | -3.4469229230 | 1.6774233511  |
| H | 2.3272714605  | -4.3251864807 | 0.7033347436  |
| H | 0.2140441382  | -4.3946067359 | 1.9970501541  |

|   |               |               |               |
|---|---------------|---------------|---------------|
| C | 2.6268609896  | 0.2313252339  | 1.1061832939  |
| C | 3.8822750774  | 0.2300556790  | 0.4446606869  |
| C | 4.3725348497  | -0.9766964457 | -0.1312820195 |
| C | 3.7050603660  | -2.1389556220 | 0.0543789545  |
| H | 5.3312859278  | -0.9573315813 | -0.6479583700 |
| H | 4.1214545510  | -3.0830965141 | -0.2950792565 |
| C | 2.3031788265  | 1.3684755347  | 1.8765063266  |
| C | 3.1075839990  | 2.4801011940  | 1.8915462309  |
| C | 4.2886678079  | 2.5134079516  | 1.1367888770  |
| C | 4.6733994842  | 1.3957155190  | 0.4429884345  |
| H | 4.9141275473  | 3.4033741521  | 1.1378014946  |
| H | 5.6194629777  | 1.3780455987  | -0.0972163307 |
| C | -4.6733387294 | 1.3956863243  | -0.4428338010 |
| C | -4.2886262569 | 2.5133795982  | -1.1366447662 |
| C | -3.1075875022 | 2.4800588069  | -1.8914713523 |
| C | -2.3031984113 | 1.3684209713  | -1.8764814500 |
| H | -5.6193723296 | 1.3780269347  | 0.0974237110  |
| H | -4.9140723383 | 3.4033552341  | -1.1376164308 |
| H | -2.8262947620 | 3.3363047878  | -2.5007432328 |
| H | -1.4119143796 | 1.3576402133  | -2.4964776781 |
| H | 2.8262718910  | 3.3363482968  | 2.5008073637  |
| H | 1.4118644782  | 1.3577032277  | 2.4964586966  |

7) [12]-helicene **E = -1921.153769 hartree**

|   |               |               |               |
|---|---------------|---------------|---------------|
| C | -0.3955971455 | -0.5047997062 | -1.2057755774 |
| C | -1.2440142242 | -1.1912758360 | -2.0965565045 |
| C | 0.0000000000  | -1.1789732861 | 0.0000000000  |
| C | 0.0000000000  | -2.5860685547 | 0.0000000000  |
| C | -0.7258654212 | -3.2807791703 | -1.0053623668 |
| C | -1.4145144230 | -2.5957734160 | -1.9552225004 |
| H | -0.7679822650 | -4.3679655315 | -0.9580024775 |
| C | 0.3956016816  | -0.5047975604 | 1.2058035761  |
| C | 1.2440470650  | -1.1912439796 | 2.0965807620  |
| C | 1.4146277622  | -2.5957289016 | 1.9552209710  |
| C | 0.7260251216  | -3.2807561194 | 1.0053424432  |
| H | 2.0561490248  | -3.1156224178 | 2.6656408048  |
| H | 0.7682021857  | -4.3679393849 | 0.9579644932  |
| C | -0.0695501392 | 0.8049346778  | 1.5855055553  |
| C | 0.7152105915  | 1.5383729953  | 2.4990651959  |
| C | 1.7128286615  | 0.8695011345  | 3.2602820255  |
| C | 1.8963285429  | -0.4698346533 | 3.1331349925  |
| H | 2.2840215743  | 1.4461702483  | 3.9868859982  |
| H | 2.5914954998  | -1.0036090862 | 3.7797492471  |
| C | 0.5034433462  | 2.9354667088  | 2.6422457057  |
| C | -0.4408412668 | 3.5652697495  | 1.8985067474  |
| C | -1.3745680313 | 2.8162204662  | 1.1333309579  |
| C | -1.2966990227 | 1.4050595820  | 1.1167539738  |
| H | 1.1574722710  | 3.4945121947  | 3.3100766962  |
| H | -0.5430270589 | 4.6494984123  | 1.9236268531  |
| H | -2.0560119309 | -3.1156897503 | -2.6656470915 |
| C | -2.3884705404 | 3.4747703816  | 0.3909206805  |
| C | -2.4577676984 | 0.6780791686  | 0.6651275087  |
| C | -3.2987662847 | 2.7588748495  | -0.3165630389 |
| C | -3.3790957981 | 1.3503918137  | -0.1621912043 |
| H | -2.3894514920 | 4.5637215064  | 0.3671222209  |
| H | -4.0324405623 | 3.2557517606  | -0.9502127085 |
| C | -4.4145677078 | 0.6224821598  | -0.8166113328 |
| C | -4.5894514677 | -0.7006459149 | -0.5940924163 |
| C | -3.8313935509 | -1.3639849104 | 0.4124048520  |
| C | -2.8040195606 | -0.6615173189 | 1.0942894434  |



|   |               |               |               |
|---|---------------|---------------|---------------|
| H | -5.0563119022 | 1.1604422834  | -1.5135353697 |
| H | -5.3641732331 | -1.2593312904 | -1.1178400518 |
| C | 0.0695061349  | 0.8049482777  | -1.5854795040 |
| C | -0.7152965405 | 1.5383650365  | -2.4990199143 |
| C | -1.7129027939 | 0.8694625840  | -3.2602246257 |
| C | -1.8963417088 | -0.4698833408 | -3.1330929282 |
| H | -2.2841281400 | 1.4461149175  | -3.9868166019 |
| H | -2.5914913193 | -1.0036805939 | -3.7797068759 |
| C | 1.2966580591  | 1.4051018368  | -1.1167691718 |
| C | 1.3744864851  | 2.8162647266  | -1.1333420389 |
| C | 0.4407134604  | 3.5652921126  | -1.8984845590 |
| C | -0.5035753129 | 2.9354659785  | -2.6421987518 |
| H | 0.5428674061  | 4.6495235800  | -1.9236016908 |
| H | -1.1576375807 | 3.4944948906  | -3.3100113110 |
| C | 2.4577561412  | 0.6781509673  | -0.6651646358 |
| C | 3.3790651216  | 1.3504854622  | 0.1621580476  |
| C | 3.2987086732  | 2.7589675931  | 0.3165212090  |
| C | 2.3883896080  | 3.4748402647  | -0.3909550919 |
| H | 4.0323712242  | 3.2558627714  | 0.9501707395  |
| H | 2.3893402590  | 4.5637911779  | -0.3671516484 |
| C | 2.8040475223  | -0.6614395669 | -1.0943220725 |
| C | 3.8314095797  | -1.3638901666 | -0.4124012128 |
| C | 4.5894368730  | -0.7005316496 | 0.5941052488  |
| C | 4.4145373277  | 0.6225982348  | 0.8166005905  |
| H | 5.3641555056  | -1.2592009911 | 1.1178746283  |
| H | 5.0562610906  | 1.1605731489  | 1.5135321523  |
| C | -4.1526708523 | -2.6810339349 | 0.7954023442  |
| C | -3.5420404681 | -3.2750884515 | 1.8690111982  |
| C | -2.6106658968 | -2.5440253935 | 2.6194188265  |
| C | -2.2555107709 | -1.2733907033 | 2.2417854328  |
| H | -4.9252384325 | -3.2082420825 | 0.2364412271  |
| H | -3.8070731325 | -4.2884726421 | 2.1623270616  |
| H | -2.1680382913 | -2.9801262014 | 3.5124144555  |
| H | -1.5570441295 | -0.7190944294 | 2.8613397768  |
| C | 2.2556064038  | -1.2733204921 | -2.2418478704 |
| C | 2.6107925501  | -2.5439519173 | -2.6194622508 |
| C | 3.5421365085  | -3.2750053231 | -1.8690082613 |
| C | 4.1527161075  | -2.6809386407 | -0.7953778433 |
| H | 1.5571732964  | -0.7190322511 | -2.8614447814 |
| H | 2.1682152640  | -2.9800573661 | -3.5124803963 |
| H | 3.8071953724  | -4.2883865661 | -2.1623104454 |
| H | 4.9252716119  | -3.2081333471 | -0.2363870674 |

**8) [13]-helicene E =-2074.703948 hartree**

|   |               |               |               |
|---|---------------|---------------|---------------|
| C | 0.1130836660  | -0.8057215802 | 0.7096988087  |
| C | 0.4802032267  | -2.0197619637 | 1.3203790996  |
| C | -0.1126214324 | -0.8058795873 | -0.7099921052 |
| C | -0.4789292595 | -2.0201801724 | -1.3206056139 |
| C | -0.2802929789 | -3.2402593410 | -0.6179617376 |
| C | 0.2822487702  | -3.2400209890 | 0.6178567858  |
| H | -0.5290475326 | -4.1746139632 | -1.1194142164 |
| C | 0.0413671781  | 0.3515500421  | -1.5492450734 |
| C | -0.6554701887 | 0.3773807852  | -2.7735941994 |
| C | -1.2063477608 | -0.8274723670 | -3.2886572907 |
| C | -1.0269115529 | -2.0028121160 | -2.6314286197 |
| H | -1.7182094835 | -0.7957950042 | -4.2499461334 |
| H | -1.3573772016 | -2.9444470736 | -3.0679179972 |
| C | 0.9152265435  | 1.4577676272  | -1.2487278861 |
| C | 0.6300335292  | 2.6987158093  | -1.8553262628 |

|   |               |               |               |
|---|---------------|---------------|---------------|
| C | -0.2436026114 | 2.7458568097  | -2.9761194886 |
| C | -0.7794382213 | 1.6046265960  | -3.4801579612 |
| H | -0.4200014316 | 3.7076514028  | -3.4562667902 |
| H | -1.3671622968 | 1.6189574186  | -4.3971609473 |
| C | 1.2224220001  | 3.8830793104  | -1.3417533715 |
| C | 2.0609843234  | 3.8238837378  | -0.2767376574 |
| C | 2.5309947804  | 2.5712261446  | 0.2018643278  |
| C | 2.0844729651  | 1.3747345846  | -0.4042586625 |
| H | 0.9413665007  | 4.8382564208  | -1.7833451708 |
| H | 2.4439040493  | 4.7322599130  | 0.1867708057  |
| H | 0.5314246422  | -4.1741852080 | 1.1194470572  |
| C | 3.4546277961  | 2.5153635365  | 1.2768919356  |
| C | 2.8511600689  | 0.1769735506  | -0.1634155161 |
| C | 3.9307655008  | 1.3221795510  | 1.7142596466  |
| C | 3.6714230049  | 0.1350544185  | 0.9815606426  |
| H | 3.7362822395  | 3.4462008183  | 1.7674451843  |
| H | 4.5814189915  | 1.2639293111  | 2.5860261676  |
| C | 4.2697015728  | -1.0927259946 | 1.3879853512  |
| C | 4.1326033412  | -2.2174884728 | 0.6489041737  |
| C | 3.5108254581  | -2.1615563784 | -0.6310553862 |
| C | 2.9272094752  | -0.9464617523 | -1.0753658070 |
| H | 4.8297722919  | -1.1039515207 | 2.3224140477  |
| H | 4.5650741098  | -3.1613199286 | 0.9786363723  |
| C | -0.0415402465 | 0.3516881457  | 1.5488842275  |
| C | 0.6554021206  | 0.3779894522  | 2.7731631422  |
| C | 1.2070527360  | -0.8264751061 | 3.2882795270  |
| C | 1.0282737714  | -2.0019628289 | 2.6311638512  |
| H | 1.7190745083  | -0.7943920708 | 4.2494717472  |
| H | 1.3595041977  | -2.9433306314 | 3.0676399463  |
| C | -0.9160871550 | 1.4574480412  | 1.2484714574  |
| C | -0.6314888035 | 2.6985881241  | 1.8550088570  |
| C | 0.2422212620  | 2.7462362826  | 2.9757279556  |
| C | 0.7787098988  | 1.6053146692  | 3.4797198395  |
| H | 0.4181493770  | 3.7081269056  | 3.4558556248  |
| H | 1.3664657197  | 1.6199636491  | 4.3966989597  |
| C | -2.0854278178 | 1.3738090377  | 0.4041850116  |
| C | -2.5328002273 | 2.5700450211  | -0.2018437729 |
| C | -2.0633439245 | 3.8229299329  | 0.2766270630  |
| C | -1.2246149475 | 3.8825776398  | 1.3414909895  |
| H | -2.4468305051 | 4.7311251295  | -0.1867712634 |
| H | -0.9439855416 | 4.8379357606  | 1.7829685766  |
| C | -2.8514850260 | 0.1755467502  | 0.1635345571  |
| C | -3.6721670228 | 0.1331823927  | -0.9811131439 |
| C | -3.9324624663 | 1.3201855954  | -1.7136680794 |
| C | -3.4567759486 | 2.5136155478  | -1.2765571833 |
| H | -4.5834561492 | 1.2615821668  | -2.5851646459 |
| H | -3.7392203583 | 3.4442742323  | -1.7669934627 |
| C | 3.5521016509  | -3.2748611487 | -1.4929435393 |
| C | 3.1096779479  | -3.1852845441 | -2.7870761901 |
| C | 2.6463044367  | -1.9534345852 | -3.2695863420 |
| C | 2.5613870628  | -0.8664037492 | -2.4360354699 |
| H | 3.9775107561  | -4.2046682654 | -1.1165085996 |
| H | 3.1577788335  | -4.0488053623 | -3.4468050488 |
| C | -2.9265097071 | -0.9479634990 | 1.0755262853  |
| C | -3.5096192674 | -2.1633785737 | 0.6314045268  |
| C | -4.1317685112 | -2.2196429755 | -0.6483631641 |
| C | -4.2697961950 | -1.0949646682 | -1.3873718814 |
| H | -4.5636871999 | -3.1637477725 | -0.9780435615 |
| H | -4.8301474044 | -1.1065407160 | -2.3216372526 |
| C | -3.5500414899 | -3.2767001295 | 1.4933096929  |
| C | -3.1070428042 | -3.1869260571 | 2.7872270744  |
| C | -2.6441169504 | -1.9548473296 | 3.2695756103  |

|   |               |               |               |
|---|---------------|---------------|---------------|
| C | -2.5601889262 | -0.8677161457 | 2.4360568804  |
| H | -3.9750247768 | -4.2067680829 | 1.1170286485  |
| H | -3.1544834353 | -4.0504661638 | 3.4469795079  |
| H | -2.3547669263 | -1.8522003918 | 4.3132558577  |
| H | -2.2313811738 | 0.0824092057  | 2.8458607189  |
| H | 2.2322194064  | 0.0835662316  | -2.8459328352 |
| H | 2.3572799201  | -1.8508889214 | -4.3133668367 |

**9) [14]-helicene      E = -2228.253978 hartree**

|   |               |               |               |
|---|---------------|---------------|---------------|
| C | -0.4718782658 | 0.2298597263  | -1.1793756196 |
| C | -0.4131008708 | 0.9180652935  | -2.4059509094 |
| C | 0.0000000000  | 0.9051890149  | -0.0002819879 |
| C | 0.0000000000  | 2.3134233269  | -0.0005534057 |
| C | -0.1331536007 | 3.0091581861  | -1.2331720394 |
| C | -0.2295192558 | 2.3278722407  | -2.4041740805 |
| H | -0.0918442846 | 4.0976996432  | -1.2213031290 |
| C | 0.4717703798  | 0.2303174429  | 1.1790883345  |
| C | 0.4129187889  | 0.9189908139  | 2.4053968397  |
| C | 0.2293588638  | 2.3287998354  | 2.4030688092  |
| C | 0.1330519490  | 3.0096343768  | 1.2317992426  |
| H | 0.2328502544  | 2.8544290823  | 3.3573150122  |
| H | 0.0917405997  | 4.0981711189  | 1.2195090383  |
| C | 1.0346546537  | -1.0934640063 | 1.1811132206  |
| C | 0.9865535989  | -1.8300641365 | 2.3812903359  |
| C | 0.7133911480  | -1.1557307594 | 3.6023867947  |
| C | 0.5450872728  | 0.1921503630  | 3.6196146986  |
| H | 0.7107884481  | -1.7330592491 | 4.5263521760  |
| H | 0.4413364036  | 0.7314613273  | 4.5604218907  |
| C | 1.2383057463  | -3.2290639304 | 2.3510542878  |
| C | 1.5240959635  | -3.8522298930 | 1.1791080305  |
| C | 1.7914407513  | -3.0937800411 | 0.0061747173  |
| C | 1.7162428864  | -1.6863122212 | 0.0574432128  |
| H | 1.1372814934  | -3.7949116930 | 3.2763844330  |
| H | 1.6212618954  | -4.9361271109 | 1.1296014651  |
| H | -0.2330565880 | 2.8531349159  | -3.3586217095 |
| C | 2.1415777956  | -3.7333485604 | -1.2125451721 |
| C | 2.3682746562  | -0.9384245400 | -0.9919705902 |
| C | 2.4060985128  | -2.9980257423 | -2.3220295845 |
| C | 2.5483733146  | -1.5871105287 | -2.2349197818 |
| H | 2.1353601644  | -4.8219684574 | -1.2485351651 |
| H | 2.5812813054  | -3.4780129202 | -3.2841343126 |
| C | 2.8781101487  | -0.8262196511 | -3.3859857330 |
| C | 3.0402406426  | 0.5184368390  | -3.2994910247 |
| C | 3.0864325160  | 1.1542666848  | -2.0318546366 |
| C | 2.8856877124  | 0.4015607123  | -0.8579266107 |
| H | 2.9512630137  | -1.3399801569 | -4.3436758319 |
| H | 3.2166109354  | 1.1200792017  | -4.1903575409 |
| C | -1.0347566897 | -1.0939255811 | -1.1808561568 |
| C | -0.9867698366 | -1.8309749140 | -2.3807627568 |
| C | -0.7137073155 | -1.1571026460 | -3.6021357372 |
| C | -0.5453738699 | 0.1907675960  | -3.6198835312 |
| H | -0.7111857279 | -1.7347783924 | -4.5258842458 |
| H | -0.4416873767 | 0.7297213450  | -4.5609022302 |
| C | -1.7162018434 | -1.6863682504 | -0.0568853817 |
| C | -1.7913701908 | -3.0938184487 | -0.0050853521 |
| C | -1.5241670797 | -3.8526985905 | -1.1777717998 |
| C | -1.2385169991 | -3.2299637116 | -2.3499808994 |
| H | -1.6213132045 | -4.9365786842 | -1.1278520053 |
| H | -1.1375865429 | -3.7961545344 | -3.2751113860 |

|   |               |               |               |
|---|---------------|---------------|---------------|
| C | -2.3680997684 | -0.9381028320 | 0.9923429299  |
| C | -2.5480183266 | -1.5863329715 | 2.2355566043  |
| C | -2.4057061014 | -2.9972132436 | 2.3231686755  |
| C | -2.1413282091 | -3.7329415755 | 1.2139195194  |
| H | -2.5807500380 | -3.4768480371 | 3.2854743269  |
| H | -2.1350873154 | -4.8215480314 | 1.2503112425  |
| C | -2.8855510206 | 0.4018249379  | 0.8578728093  |
| C | -3.0861704781 | 1.1549570229  | 2.0315495766  |
| C | -3.0397983351 | 0.5195959757  | 3.2994144051  |
| C | -2.8776201148 | -0.8250240757 | 3.3863850977  |
| H | -3.2160687139 | 1.1215624907  | 4.1900818766  |
| H | -2.9506366107 | -1.3384321283 | 4.3442746012  |
| C | 3.3737845152  | 2.5474418516  | -1.9466492474 |
| C | 3.5469885449  | 3.1554107760  | -0.7504534022 |
| C | 3.5924099998  | 2.3828152711  | 0.4449153836  |
| C | 3.3272904286  | 0.9897137817  | 0.3901439352  |
| H | 3.4374890639  | 3.1142353755  | -2.8748932540 |
| H | 3.7373625918  | 4.2261355613  | -0.6881327894 |
| C | -3.3273100823 | 0.9895109851  | -0.3903623340 |
| C | -3.5924808461 | 2.3825840472  | -0.4456117596 |
| C | -3.5469454646 | 3.1556172874  | 0.7494697146  |
| C | -3.3735761358 | 2.5480920516  | 1.9458671394  |
| H | -3.7373596443 | 4.2263132749  | 0.6867799373  |
| H | -3.4371838503 | 3.1152243337  | 2.8739110746  |
| C | 3.9874590865  | 2.9732534119  | 1.6612964216  |
| C | 4.1973049127  | 2.2129934405  | 2.7822292443  |
| C | 4.0547079795  | 0.8207384441  | 2.7030489134  |
| C | 3.6351306718  | 0.2288704475  | 1.5381626580  |
| H | 4.1557028684  | 4.0495717114  | 1.6829784206  |
| H | 4.5137342470  | 2.6790671314  | 3.7127913487  |
| H | 4.2844525569  | 0.1993935951  | 3.5660274890  |
| H | 3.5704692755  | -0.8539452719 | 1.4950581685  |
| C | -3.9876830502 | 2.9725652010  | -1.6621642087 |
| C | -4.1976231704 | 2.2118902489  | -2.7827978188 |
| C | -4.0549642865 | 0.8196697707  | -2.7031289673 |
| C | -3.6352401321 | 0.2282392650  | -1.5380731688 |
| H | -4.1559650545 | 4.0488697949  | -1.6842200397 |
| H | -4.5141686327 | 2.6776149738  | -3.7134948633 |
| H | -4.2847762704 | 0.1980033921  | -3.5658579035 |
| H | -3.5705275061 | -0.8545586042 | -1.4945832954 |

**10) [20]-helicene E = -3149.553138 hartree**

|   |               |               |               |
|---|---------------|---------------|---------------|
| C | -0.5975818267 | 0.9206042963  | -1.1266160484 |
| C | -0.6325382995 | 1.6084615644  | -2.3561028130 |
| C | 0.0000000000  | 1.5909059093  | 0.0005519391  |
| C | 0.0000000000  | 3.0003242658  | 0.0011764184  |
| C | -0.2340265846 | 3.6974338799  | -1.2153841073 |
| C | -0.4325945776 | 3.0157391292  | -2.3729301615 |
| H | -0.1821106643 | 4.7859638750  | -1.2075076326 |
| C | 0.5974316727  | 0.9196158462  | 1.1271415425  |
| C | 0.6323390696  | 1.6063812471  | 2.3572387766  |
| C | 0.4323829051  | 3.0136450480  | 2.3753040716  |
| C | 0.2338274700  | 3.6963587559  | 1.2183608402  |
| H | 0.5099630656  | 3.5361459420  | 3.3285827852  |
| H | 0.1818897264  | 4.7848947042  | 1.2114455789  |
| C | 1.1682620991  | -0.4028470765 | 1.0830257953  |
| C | 1.2123585577  | -1.1412199794 | 2.2824059222  |
| C | 1.0396969823  | -0.4676941177 | 3.5221345889  |
| C | 0.8670705230  | 0.8786277586  | 3.5553861904  |

|   |               |               |               |
|---|---------------|---------------|---------------|
| H | 1.1217210481  | -1.0456532369 | 4.4424074457  |
| H | 0.8401532839  | 1.4171794335  | 4.5024714880  |
| C | 1.4417319120  | -2.5430080133 | 2.2301787033  |
| C | 1.6053892197  | -3.1730360655 | 1.0384613905  |
| C | 1.7688565369  | -2.4211578484 | -0.1564073831 |
| C | 1.7210842122  | -1.0140618496 | -0.0984391942 |
| H | 1.4238200254  | -3.1056712509 | 3.1633371468  |
| H | 1.6890223758  | -4.2581148779 | 0.9847328747  |
| H | -0.5101987817 | 3.5390836375  | -3.3257437230 |
| C | 1.9910611645  | -3.0609218934 | -1.4063962202 |
| C | 2.2625093300  | -0.2829103629 | -1.2137585172 |
| C | 2.1401928330  | -2.3295748208 | -2.5407446589 |
| C | 2.2982833552  | -0.9187967540 | -2.4700784135 |
| H | 1.9794470371  | -4.1499041974 | -1.4398844115 |
| H | 2.2159833235  | -2.8131544399 | -3.5140987472 |
| C | 2.5138989275  | -0.1410362615 | -3.6395764695 |
| C | 2.6866695081  | 1.2033709220  | -3.5533292415 |
| C | 2.8813786012  | 1.8209254789  | -2.2882685548 |
| C | 2.8343708635  | 1.0346878649  | -1.1192354392 |
| H | 2.4764309055  | -0.6401222662 | -4.6072561324 |
| H | 2.7531184387  | 1.8197737141  | -4.4493296710 |
| C | -1.1684067867 | -0.4019010209 | -1.0836519707 |
| C | -1.2125660958 | -1.1392050631 | -2.2836878116 |
| C | -1.0399293123 | -0.4645816667 | -3.5228260806 |
| C | -0.8672944603 | 0.8817663933  | -3.5548897957 |
| H | -0.8403995471 | 1.4211598886  | -4.5014962091 |
| C | -1.7211564873 | -1.0141620916 | 0.0973012033  |
| C | -1.7689729347 | -2.4213098916 | 0.1540041523  |
| C | -1.6056087595 | -3.1721203667 | -1.0415471710 |
| C | -1.4419788102 | -2.5410285730 | -2.2327075089 |
| H | -1.6892686549 | -4.2572445666 | -0.9887923995 |
| H | -1.4241275091 | -3.1028577427 | -3.1663694275 |
| C | -2.2624213702 | -0.2839999700 | 1.2133506539  |
| C | -2.2980631751 | -0.9210251827 | 2.4690977476  |
| C | -2.1400467801 | -2.3318761066 | 2.5384633653  |
| C | -1.9910831889 | -3.0621968613 | 1.4034343783  |
| H | -2.2157496547 | -2.8163369328 | 3.5113856186  |
| H | -1.9795125440 | -4.1512098946 | 1.4359309285  |
| C | -2.8342562808 | 1.0337025211  | 1.1200978446  |
| C | -2.8810813623 | 1.8188775684  | 2.2898539432  |
| C | -2.6862045466 | 1.2001726808  | 3.5543265924  |
| C | -2.5134793270 | -0.1443189472 | 3.6393320531  |
| H | -2.7525096626 | 1.8157653925  | 4.4508944427  |
| H | -2.4759017706 | -0.6442857373 | 4.6065526812  |
| C | 3.1604774573  | 3.2107293212  | -2.1846207894 |
| C | 3.3853727288  | 3.7799261934  | -0.9727523186 |
| C | 3.5614901595  | 2.9685369506  | 0.1812415791  |
| C | 3.4572766350  | 1.5659470333  | 0.0680597385  |
| H | 3.1321105478  | 3.8144952186  | -3.0909218650 |
| H | 3.5045207773  | 4.8581371270  | -0.8724335383 |
| C | -3.4573708232 | 1.5660309185  | -0.0666074773 |
| C | -3.5616529344 | 2.9687215224  | -0.1784860740 |
| C | -3.3853254733 | 3.7790666456  | 0.9762075282  |
| C | -3.1601948291 | 3.2087732917  | 2.1875175319  |
| H | -3.5045165438 | 4.8573657242  | 0.8768913747  |
| H | -3.1316766701 | 3.8117158211  | 3.0943618238  |
| C | 3.8548733924  | 3.5517534206  | 1.4423417570  |
| C | 4.0436910550  | 2.7678393655  | 2.5333992717  |
| C | 4.1702316774  | 1.3597354111  | 2.3941706521  |
| C | 4.0451513989  | 0.7646410401  | 1.1173626493  |
| H | 3.8665751304  | 4.6380489013  | 1.5217693407  |
| H | 4.1740725673  | 3.2046670829  | 3.5228047124  |

|   |               |               |               |
|---|---------------|---------------|---------------|
| C | -3.8553208170 | 3.5530831476  | -1.4389899221 |
| C | -4.0443469967 | 2.7701642844  | -2.5307240587 |
| C | -4.1707868055 | 1.3619260301  | -2.3927654431 |
| C | -4.0454116324 | 0.7656593464  | -1.1165336509 |
| H | -3.8670837173 | 4.6394506494  | -1.5174154876 |
| H | -4.1749591296 | 3.2078934605  | -3.5197006489 |
| C | -4.4401393445 | 0.5535775877  | -3.5266933288 |
| C | -4.6088779176 | -0.7860157988 | -3.3932632902 |
| C | -4.7222385508 | -1.3671641807 | -2.1040209830 |
| C | -4.5717034461 | -0.5684708517 | -0.9526378059 |
| H | -4.4657135583 | 1.0280705356  | -4.5068701571 |
| H | -4.7428547816 | -1.4243213415 | -4.2658413838 |
| C | 4.4394095033  | 0.5503506439  | 3.5274013785  |
| C | 4.6083010986  | -0.7891016375 | 3.3927547244  |
| C | 4.7220013682  | -1.3690325784 | 2.1029937812  |
| C | 4.5716086758  | -0.5692805087 | 0.9523286077  |
| H | 4.4647425552  | 1.0239329414  | 4.5080249012  |
| H | 4.7421724869  | -1.4282068939 | 4.2647640319  |
| H | -1.1219893568 | -1.0417261441 | -4.4436067729 |
| C | -5.0327576054 | -2.7522942981 | -1.9787796970 |
| C | -5.2796765021 | -3.3092592179 | -0.7710443701 |
| C | -5.3775834832 | -2.4878276522 | 0.3878580664  |
| C | -5.0872076702 | -1.1014172064 | 0.2927339282  |
| H | -5.0554528941 | -3.3548795852 | -2.8862406655 |
| H | -5.4905701732 | -4.3738099975 | -0.6766443892 |
| C | 5.0327473129  | -2.7539992171 | 1.9765174909  |
| C | 5.2800402585  | -3.3097875326 | 0.7683163081  |
| C | 5.3780917050  | -2.4872504680 | -0.3897904718 |
| C | 5.0874580292  | -1.1009809527 | -0.2934317971 |
| C | 5.8510434666  | -3.0215722231 | -1.6041116748 |
| C | 6.1125694588  | -2.2133249859 | -2.6797786895 |
| C | 5.9436796416  | -0.8278135275 | -2.5524258278 |
| C | 5.4484776716  | -0.2902609641 | -1.3906936114 |
| H | 6.0377801557  | -4.0937063820 | -1.6589685816 |
| H | 6.4893649587  | -2.6364437433 | -3.6084199388 |
| H | 6.2121331456  | -0.1677682727 | -3.3745575161 |
| H | 5.3660575273  | 0.7888953378  | -1.3080353638 |
| C | -5.8501633920 | -3.0233733995 | 1.6017847873  |
| C | -6.1115926506 | -2.2161823788 | 2.6782682643  |
| C | -5.9429859961 | -0.8305223222 | 2.5521711136  |
| C | -5.4481378340 | -0.2917915885 | 1.3908335841  |
| H | -6.0367033330 | -4.0955906550 | 1.6556739137  |
| H | -6.4881032943 | -2.6402371343 | 3.6065978706  |
| H | -6.2113730354 | -0.1712932433 | 3.3749794926  |
| H | -5.3659405262 | 0.7874570923  | 1.3091713274  |
| H | 5.4911158608  | -4.3742175327 | 0.6729663801  |
| H | 5.0553385495  | -3.3574345587 | 2.8834163832  |

**11) Benzene E = -232.099491 hartree**

|   |               |               |               |
|---|---------------|---------------|---------------|
| C | -1.2021762035 | 0.6940733130  | 0.0001951594  |
| C | 0.0000000000  | 1.3881572762  | 0.0000000000  |
| C | 1.2020872301  | 0.6941039058  | 0.0000000000  |
| C | 1.2020892934  | -0.6941235430 | -0.0001175045 |
| C | 0.0000000000  | -1.3881572762 | 0.0000000000  |
| C | -1.2021738776 | -0.6940563228 | 0.0002248331  |
| H | -2.1441044594 | 1.2381243881  | 0.0003324018  |
| H | 0.0000000000  | 2.4759209569  | 0.0000000000  |
| H | 2.1442356750  | 1.2377717148  | 0.0000000000  |
| H | 2.1440892236  | -1.2380483174 | -0.0001872443 |
| H | -0.0002321271 | -2.4759196496 | 0.0000000000  |
| H | -2.1442514268 | -1.2378491300 | 0.0003391703  |

**12) Phenanthrene E = -692.753348 hartree**

|   |               |               |               |
|---|---------------|---------------|---------------|
| C | -0.1213206067 | 1.2750416674  | -0.2772172115 |
| C | 0.0623013861  | 2.4719226226  | 0.4699632148  |
| C | 0.0000000000  | 0.0000000000  | 0.3955589331  |
| C | 0.0000000000  | 0.0000000000  | 1.8029387243  |
| C | 0.1310607065  | 1.2198396471  | 2.5240390371  |
| C | 0.2278741090  | 2.4060066423  | 1.8802491812  |
| C | 0.1213206067  | -1.2750416674 | -0.2772172115 |
| C | -0.0623013861 | -2.4719226226 | 0.4699632148  |
| C | -0.2278741090 | -2.4060066423 | 1.8802491812  |
| C | -0.1310607065 | -1.2198396471 | 2.5240390371  |
| C | 0.5217650731  | -1.4207961904 | -1.6249661677 |
| C | 0.6125903560  | -2.6530628552 | -2.2241440140 |
| C | 0.3106750497  | -3.8183553653 | -1.5073731752 |
| C | 0.0000000000  | -3.7216918554 | -0.1765531627 |
| C | -0.5217650731 | 1.4207961904  | -1.6249661677 |
| C | -0.6125903560 | 2.6530628552  | -2.2241440140 |
| C | -0.3106750497 | 3.8183553653  | -1.5073731752 |
| C | 0.0000000000  | 3.7216918554  | -0.1765531627 |
| H | 0.3702253409  | 3.3333788665  | 2.4328612745  |
| H | 0.1783435565  | 1.1713781908  | 3.6109126122  |
| H | -0.3702253409 | -3.3333788665 | 2.4328612745  |
| H | -0.1783435565 | -1.1713781908 | 3.6109126122  |
| H | 0.8292570171  | -0.5476723299 | -2.1896345530 |
| H | 0.9422357272  | -2.7225902371 | -3.2583588156 |
| H | 0.3662376625  | -4.7902399814 | -1.9919384398 |
| H | -0.1736886132 | -4.6186027977 | 0.4166787353  |
| H | -0.8292570171 | 0.5476723299  | -2.1896345530 |
| H | -0.9422357272 | 2.7225902371  | -3.2583588156 |
| H | -0.3662376625 | 4.7902399814  | -1.9919384398 |
| H | 0.1736886132  | 4.6186027977  | 0.4166787353  |

**13) [6]-helicene IEFPCM(chloroform) E = -999.855656 hartree**

|   |               |               |               |
|---|---------------|---------------|---------------|
| C | 2.9490605093  | -2.5051347157 | 0.6642446930  |
| C | 2.0211258015  | -3.1448680102 | 1.4452962645  |
| C | 1.1771968118  | 3.5882955729  | -0.3547965522 |
| H | 1.1353224793  | 4.6753173706  | -0.3963226877 |
| H | 3.8795901010  | -3.0014240231 | 0.3919567174  |
| C | -2.0222453553 | -3.1442481161 | -1.4453135633 |
| C | -2.9498626626 | -2.5042434437 | -0.6641096258 |
| C | -2.7411047136 | -1.1815848074 | -0.2240868453 |
| C | -3.7695857585 | -0.4770717555 | 0.4658126430  |
| C | -1.2826151458 | 0.8017707008  | 0.0050030679  |
| C | -2.3974202499 | 1.5179014151  | 0.4874254632  |
| C | -3.6255706516 | 0.8400364733  | 0.7440600366  |
| C | -2.3102741933 | 2.9199801472  | 0.6865184021  |
| H | -3.1922584277 | 3.4529132619  | 1.0373556536  |
| C | 0.0002528603  | 1.4621882784  | 0.0000000000  |
| H | -4.6959017502 | -0.9998916587 | 0.6981825103  |
| H | -3.8805064719 | -3.0002495513 | -0.3916956235 |
| H | -4.4428755029 | 1.4089338842  | 1.1845261648  |
| C | -1.1760192866 | 3.5886568157  | 0.3547305406  |
| C | 0.0004739427  | 2.8797549532  | 0.0000000000  |
| C | 1.2829174383  | 0.8013869045  | -0.0050540520 |
| H | -1.1338052595 | 4.6756650136  | 0.3962701589  |
| C | 2.3112693798  | 2.9192721875  | -0.6865130944 |
| C | 2.3979812836  | 1.5171715792  | -0.4873870650 |
| C | 3.6259555063  | 0.8389296145  | -0.7438819790 |
| C | 3.7695463983  | -0.4782151074 | -0.4655860742 |
| C | 2.7407725385  | -1.1824081331 | 0.2242057308  |
| C | 1.5223892982  | -0.5226855261 | 0.5300468764  |
| H | 4.4434785109  | 1.4075715810  | -1.1842730118 |
| H | 4.6957268042  | -1.0013214955 | -0.6978522031 |
| H | 3.1934407736  | 3.4519355912  | -1.0372891096 |
| C | -1.5225541846 | -0.5222344051 | -0.5300765262 |
| C | -0.6294805496 | -1.1796829551 | -1.4018720355 |
| C | -0.8678350518 | -2.4558887542 | -1.8471493795 |
| H | -2.1963199715 | -4.1631478784 | -1.7828381926 |
| H | 0.2630872322  | -0.6630415451 | -1.7422201057 |
| H | -0.1589659808 | -2.9312062290 | -2.5212529296 |
| C | 0.6289466733  | -1.1798904190 | 1.4016435844  |
| C | 0.8668451412  | -2.4561763620 | 1.8469379255  |
| H | 2.1948339943  | -4.1638286173 | 1.7828256511  |
| H | -0.2635498823 | -0.6629960676 | 1.7418058128  |
| H | 0.1577087182  | -2.9313024016 | 2.5208947349  |

**14) Hexa-peri-hexabenz [7] helicene E =-1842.622090 hartree**

|   |               |              |               |
|---|---------------|--------------|---------------|
| C | -2.7052089195 | 2.8489983218 | 0.1137772438  |
| C | -1.4304807737 | 3.5323120002 | 0.0284857082  |
| C | -2.7213979268 | 1.4372427906 | 0.0462487316  |
| C | -1.5002292035 | 0.7129288217 | -0.1588089469 |
| C | -0.3906581684 | 1.3933428313 | -0.6406343881 |
| C | -0.2873472694 | 2.7992271360 | -0.3764967401 |
| C | -1.2903621309 | 4.8916347112 | 0.3306802412  |
| C | -0.0624289813 | 5.5096037250 | 0.2486007187  |
| C | 1.0677281183  | 4.7809506988 | -0.1011397273 |
| C | 0.9892123175  | 3.4269103458 | -0.3948463415 |
| H | -2.1516673317 | 5.4699203555 | 0.6530003493  |
| H | 0.0285850779  | 6.5688593880 | 0.4775351533  |



|   |               |               |               |
|---|---------------|---------------|---------------|
| H | 2.0261186626  | 5.2913462355  | -0.1417893717 |
| C | -5.1035456514 | 2.8337634527  | 0.3861306282  |
| C | -3.9187660160 | 3.5273457038  | 0.2822027906  |
| C | -5.1193874708 | 1.4464843837  | 0.2913018816  |
| C | -3.9484517251 | 0.7274100154  | 0.0999817891  |
| H | -6.0727731629 | 0.9306731893  | 0.3652636288  |
| H | -6.0370934424 | 3.3735764215  | 0.5264561100  |
| H | -3.9381499519 | 4.6130044468  | 0.3170975534  |
| C | -3.9484625097 | -0.7273526367 | -0.0999948032 |
| C | -2.7214199406 | -1.4372050073 | -0.0462549385 |
| C | -1.5002410994 | -0.7129092845 | 0.1588060920  |
| C | -5.1194089607 | -1.4464082775 | -0.2913179331 |
| C | -5.1035889752 | -2.8336879286 | -0.3861418246 |
| C | -3.9188209552 | -3.5272890766 | -0.2822062260 |
| C | -2.7052529894 | -2.8489613058 | -0.1137787302 |
| H | -6.0727861278 | -0.9305819697 | -0.3652839624 |
| H | -6.0371450901 | -3.3734860381 | -0.5264689008 |
| H | -3.9382227190 | -4.6129475444 | -0.3170968083 |
| C | -0.3906821275 | -1.3933385926 | 0.6406352030  |
| C | -0.2873920393 | -2.7992252786 | 0.3765030167  |
| C | -1.4305358663 | -3.5322954581 | -0.0284770500 |
| C | -1.2904368189 | -4.8916239372 | -0.3306571077 |
| C | -0.0625142884 | -5.5096122447 | -0.2485638679 |
| C | 1.0676538853  | -4.7809723792 | 0.1011696973  |
| C | 0.9891583626  | -3.4269267820 | 0.3948563329  |
| H | -2.1517499310 | -5.4698998764 | -0.6529731602 |
| H | 0.0284830562  | -6.5688727233 | -0.4774828150 |
| H | 2.0260366401  | -5.2913817327 | 0.1418323599  |
| C | 0.7326519972  | -0.7409511152 | 1.3087186215  |
| C | 2.1876569701  | -2.6289188222 | 0.6734323947  |
| C | 2.0233355027  | -1.3228837112 | 1.2079937559  |
| C | 0.5862221065  | 0.4207313374  | 2.0474118116  |
| C | 1.6964526324  | 1.1089476786  | 2.5456827289  |
| C | 2.9644667841  | 0.6429730338  | 2.3073453350  |
| C | 3.1574773982  | -0.5904519364 | 1.6534227886  |
| H | -0.4084304961 | 0.8312155972  | 2.2094487681  |
| H | 1.5462799454  | 2.0370699056  | 3.0928237543  |
| H | 3.8369450643  | 1.2040347061  | 2.6388798529  |
| C | 4.4467716971  | -1.1223989082 | 1.4318646832  |
| C | 4.5955040590  | -2.3426057937 | 0.8312758705  |
| C | 3.4705473252  | -3.1007761342 | 0.4719188119  |
| H | 3.6300978579  | -4.0806146913 | 0.0290776505  |
| H | 5.3139017685  | -0.5442667200 | 1.7480016630  |
| H | 5.5890914338  | -2.7475323011 | 0.6517002773  |
| C | 2.1876989286  | 2.6288886379  | -0.6734338976 |
| C | 2.0233584954  | 1.3228567920  | -1.2079974549 |
| C | 0.7326668830  | 0.7409418122  | -1.3087218389 |
| C | 0.5862208206  | -0.4207340811 | -2.0474237816 |
| C | 1.6964415355  | -1.1089669089 | -2.5456934554 |
| C | 2.9644616670  | -0.6430114733 | -2.3073532303 |
| C | 3.1574894741  | 0.5904097345  | -1.6534284772 |
| H | -0.4084375633 | -0.8312004628 | -2.2094685488 |
| H | 1.5462557672  | -2.0370838865 | -3.0928398731 |
| H | 3.8369326551  | -1.2040829194 | -2.6388903783 |
| C | 3.4705964222  | 3.1007288416  | -0.4719250224 |
| C | 4.5955419428  | 2.3425427211  | -0.8312831203 |
| C | 4.4467916418  | 1.1223378200  | -1.4318715625 |
| H | 3.6301627773  | 4.0805644723  | -0.0290831855 |
| H | 5.5891350380  | 2.7474562954  | -0.6517100988 |
| H | 5.3139129870  | 0.5441925082  | -1.7480085106 |

**15) Hexa-peri-hexabenzos [7] helicene IEFPCM(chloroform) E =-1842.630774 hartree**

|   |               |               |               |
|---|---------------|---------------|---------------|
| C | 2.6967106669  | 2.8477079549  | -0.1429683219 |
| C | 1.4204430017  | 3.5290611376  | -0.0592577774 |
| C | 2.7151812958  | 1.4368882948  | -0.0607508868 |
| C | 1.4951960085  | 0.7137795164  | 0.1532979515  |
| C | 0.3859388787  | 1.3941472971  | 0.6347035075  |
| C | 0.2807618929  | 2.7989658653  | 0.3626979845  |
| C | 1.2777475357  | 4.8851886025  | -0.3765090515 |
| C | 0.0493660273  | 5.5029338167  | -0.2926955983 |
| C | -1.0770954863 | 4.7784190462  | 0.0792079471  |
| C | -0.9947874640 | 3.4282318653  | 0.3913272289  |
| H | 2.1357616247  | 5.4610114455  | -0.7113279972 |
| H | -0.0451597652 | 6.5584259714  | -0.5358722284 |
| H | -2.0344837319 | 5.2901233387  | 0.1200365074  |
| C | 5.0954348994  | 2.8327342719  | -0.4162432849 |
| C | 3.9093088943  | 3.5266315315  | -0.3208026242 |
| C | 5.1139377235  | 1.4458972934  | -0.3048263514 |
| C | 3.9431354627  | 0.7274045225  | -0.1073623078 |
| H | 6.0690794002  | 0.9322221439  | -0.3689473965 |
| H | 6.0281006578  | 3.3720673616  | -0.5621965298 |
| H | 3.9282410715  | 4.6116363015  | -0.3699878499 |
| C | 3.9434501432  | -0.7257490763 | 0.1075645842  |
| C | 2.7158190072  | -1.4357874633 | 0.0608109426  |
| C | 1.4955296865  | -0.7132124184 | -0.1532789821 |
| C | 5.1145547758  | -1.4437162789 | 0.3051288572  |
| C | 5.0966666070  | -2.8305656296 | 0.4165058891  |
| C | 3.9108684854  | -3.5249976969 | 0.3208954170  |
| C | 2.6979783532  | -2.8466218557 | 0.1429383387  |
| H | 6.0694563860  | -0.9296094531 | 0.3693636965  |
| H | 6.0295567948  | -3.3694831141 | 0.5625595718  |
| H | 3.9302984385  | -4.6099937989 | 0.3700509902  |
| C | 0.3866016039  | -1.3940413611 | -0.6347625425 |
| C | 0.2820405020  | -2.7989354800 | -0.3629239400 |
| C | 1.4220315546  | -3.5285594723 | 0.0590165874  |
| C | 1.2799382235  | -4.8848086533 | 0.3760334397  |
| C | 0.0518538445  | -5.5031128373 | 0.2920145325  |
| C | -1.0749196101 | -4.7790553712 | -0.0798402086 |
| C | -0.9932180726 | -3.4287767538 | -0.3917130853 |
| H | 2.1381881615  | -5.4602912353 | 0.7108302002  |
| H | -0.0421994472 | -6.5586879141 | 0.5350135749  |
| H | -2.0320707262 | -5.2911902975 | -0.1208038625 |
| C | -0.7283073571 | -0.7451880519 | -1.3219924286 |
| C | -2.1884095660 | -2.6388255435 | -0.7087662556 |
| C | -2.0175303176 | -1.3362319523 | -1.2516523099 |
| C | -0.5709901797 | 0.4114930484  | -2.0674187372 |
| C | -1.6709575041 | 1.0808146231  | -2.6138135434 |
| C | -2.9417802850 | 0.6024797587  | -2.4158850261 |
| C | -3.1438263672 | -0.6214672402 | -1.7452996525 |
| H | 0.4238988027  | 0.8296839256  | -2.2066555115 |
| H | -1.5111827960 | 1.9991588829  | -3.1743214581 |
| H | -3.8074334440 | 1.1437175794  | -2.7945414306 |
| C | -4.4351278141 | -1.1659450014 | -1.5661788394 |
| C | -4.5927016212 | -2.3809208008 | -0.9559567366 |
| C | -3.4730689657 | -3.1225657679 | -0.5476872792 |
| H | -3.6396234340 | -4.1008272869 | -0.1045264165 |
| H | -5.2961924298 | -0.6036633429 | -1.9240617098 |
| H | -5.5873081595 | -2.7950369045 | -0.8076950567 |
| C | -2.1896204240 | 2.6378054221  | 0.7085309993  |
| C | -2.0181552123 | 1.3354130718  | 1.2517091859  |
| C | -0.7286861156 | 0.7449045346  | 1.3220529136  |
| C | -0.5708385387 | -0.4115702098 | 2.0676923853  |
| C | -1.6704812869 | -1.0811853011 | 2.6143867270  |

|   |               |               |              |
|---|---------------|---------------|--------------|
| C | -2.9415091293 | -0.6033433494 | 2.4165739831 |
| C | -3.1441145148 | 0.6203405743  | 1.7456787921 |
| H | 0.4242245017  | -0.8293569311 | 2.2068843807 |
| H | -1.5102895766 | -1.9993210334 | 3.1751145572 |
| H | -3.8068984511 | -1.1447767911 | 2.795552177  |
| C | -3.4744946273 | 3.1209286259  | 0.5473295977 |
| C | -4.5937909536 | 2.3789345818  | 0.9558885045 |
| C | -4.4356573405 | 1.1642337852  | 1.5665124698 |
| H | -3.6414811423 | 4.0989695150  | 0.1038434752 |
| H | -5.5885840058 | 2.7925749075  | 0.8075499563 |
| H | -5.2964567009 | 0.6017140128  | 1.9246573411 |

**16) mono-aza-[7]-helicene E =-1131.373207 hartree**

|   |               |               |               |
|---|---------------|---------------|---------------|
| C | -1.7823386546 | 0.6051558025  | 0.0618138382  |
| C | -3.0778189610 | 1.0164986366  | -0.3453275447 |
| C | -0.7285472066 | 1.5670724663  | -0.0348436650 |
| C | -1.1069848227 | 2.9207535556  | -0.1547810596 |
| C | -2.4089806976 | 3.3438352547  | -0.4361762823 |
| C | -3.3622547227 | 2.3783573818  | -0.5967117376 |
| H | -2.6369725289 | 4.4004927158  | -0.5602742565 |
| H | -4.3778535728 | 2.6508306693  | -0.8785747192 |
| C | 0.7285794494  | 1.5670432504  | 0.0348363296  |
| C | 1.1070292524  | 2.9206940073  | 0.1550076347  |
| N | 0.0000000000  | 3.7126442268  | 0.0005213887  |
| H | 0.0002616419  | 4.7204889268  | -0.0009476100 |
| C | 3.0778664282  | 1.0164402471  | 0.3450812762  |
| C | 3.3623922347  | 2.3782873240  | 0.5964292205  |
| C | 2.4090638208  | 3.3437819983  | 0.4362199633  |
| H | 4.3780366046  | 2.6507247175  | 0.8781546319  |
| H | 2.6370344162  | 4.4004232984  | 0.5604881076  |
| C | -1.6488420983 | -0.7253767102 | 0.6082656870  |
| C | -2.6914356803 | -1.6688738318 | 0.4176577862  |
| C | -3.9154688716 | -1.2539119389 | -0.1811770057 |
| C | -4.1166165219 | 0.0483363923  | -0.4858237411 |
| H | -4.7050349414 | -1.9905347232 | -0.3218721749 |
| H | -5.0812136958 | 0.3867476811  | -0.8622197884 |
| C | -0.5512302687 | -1.1142148281 | 1.4000786804  |
| C | -0.4298201025 | -2.3943897685 | 1.8810298181  |
| C | -1.4104275610 | -3.3522061026 | 1.5933201216  |
| C | -2.5297018365 | -2.9848141665 | 0.8894038281  |
| H | 0.2071521025  | -0.3796820440 | 1.6521150594  |
| H | 0.4339801678  | -2.6622956058 | 2.4853596279  |
| H | -1.3011773806 | -4.3715012555 | 1.9569875551  |
| H | -3.3288623760 | -3.7027589690 | 0.7082282041  |
| C | 1.7823357494  | 0.6051116162  | -0.0619031623 |
| C | 1.6488051194  | -0.7254322050 | -0.6082687033 |
| C | 2.6913303793  | -1.6689808261 | -0.4175413915 |
| C | 3.9154416930  | -1.2540239340 | 0.1811495710  |
| C | 4.1166781023  | 0.0482766176  | 0.4855536258  |
| H | 4.7049867863  | -1.9906634614 | 0.3218581247  |
| H | 5.0813275218  | 0.3867264659  | 0.8617791584  |
| C | 2.5295097875  | -2.9849596373 | -0.8891452456 |
| C | 1.4102485773  | -3.3523357828 | -1.5931173885 |
| C | 0.5513310823  | -1.1142056204 | -1.4002790533 |
| H | 3.3285973217  | -3.7029469010 | -0.7078342581 |
| C | 0.4298179229  | -2.3944259642 | -1.8810937744 |
| H | 1.3009173482  | -4.3716633425 | -1.9566680590 |
| H | -0.2068604359 | -0.3795811977 | -1.6526518726 |
| H | -0.4339288884 | -2.6622759310 | -2.4855232654 |

17) tri-aza-[7]-helicene E =-1087.298895 hartree

|   |               |               |               |
|---|---------------|---------------|---------------|
| C | 1.0990025073  | -1.7488592847 | -1.0317761890 |
| C | 1.6003102298  | -2.9862183752 | -1.3896872222 |
| C | 1.9111750647  | -0.8546079605 | -0.3298745599 |
| C | 3.2544005225  | -1.2182670541 | -0.0784857964 |
| C | 3.7597477297  | -2.4669757682 | -0.4229022324 |
| C | 2.9138751620  | -3.3473410749 | -1.0722278391 |
| H | 0.0854065215  | -1.4706793607 | -1.3067595175 |
| H | 0.9674103381  | -3.6848193271 | -1.9314374188 |
| H | 4.7931830798  | -2.7328156977 | -0.2081184700 |
| H | 3.2844235026  | -4.3287505262 | -1.3604117207 |
| C | 1.7545728375  | 0.5074592562  | 0.1207658321  |
| C | 3.0352385791  | 0.9346755682  | 0.5275030623  |
| N | 3.9034576231  | -0.1428067472 | 0.4802794700  |
| H | 4.9031686207  | -0.0726799943 | 0.5852480183  |
| C | 0.7114510203  | 1.4612442527  | 0.1165067033  |
| C | 1.0905460756  | 2.8160607446  | 0.2676825383  |
| C | 2.3747323485  | 3.2235839458  | 0.6320673212  |
| C | 3.3504325916  | 2.2648799063  | 0.8081385283  |
| H | 2.5994708513  | 4.2784196297  | 0.7761667525  |
| H | 4.3595416230  | 2.5463088302  | 1.1022667846  |
| C | -0.7114509674 | 1.4612442580  | -0.1165067213 |
| C | -1.0905460068 | 2.8160607605  | -0.2676825701 |
| N | 0.0000000000  | 3.6118409213  | 0.0000000000  |
| H | 0.0000000000  | 4.6188272218  | 0.0000000000  |
| C | -1.7545728269 | 0.5074593080  | -0.1207657236 |
| C | -3.0352385474 | 0.93467556581 | -0.5275030310 |
| C | -3.3504324964 | 2.2648799804  | -0.8081386659 |
| C | -2.3747322374 | 3.2235840040  | -0.6320674482 |
| H | -4.3595415330 | 2.5463088885  | -1.1022669274 |
| H | -2.5994707031 | 4.2784196985  | -0.7761668266 |
| C | -1.9111750858 | -0.8546079076 | 0.3298746049  |
| C | -3.2544005436 | -1.2182669906 | 0.0784858007  |
| N | -3.9034576496 | -0.1428065836 | -0.4802792403 |
| H | -4.9031686207 | -0.0726799197 | -0.5852481135 |
| C | -1.0990025655 | -1.7488593006 | 1.0317762155  |
| C | -1.6003103144 | -2.9862184017 | 1.3896871534  |
| C | -2.9138752467 | -3.3473410802 | 1.0722277227  |
| C | -3.7597477879 | -2.4669757206 | 0.4229021667  |
| H | -0.0854065771 | -1.4706794242 | 1.3067595810  |
| H | -0.9674104281 | -3.6848193853 | 1.9314373288  |
| H | -3.2844236138 | -4.3287505368 | 1.3604115725  |
| H | -4.7931831645 | -2.7328155707 | 0.2081184314  |

18) tetra-aza-[7]-helicene E =-1065.244613 hartree

|   |               |               |               |
|---|---------------|---------------|---------------|
| C | 1.9094155875  | -1.0009022072 | -0.3832917893 |
| C | 3.1880057109  | -1.5945894484 | -0.2933717238 |
| C | 1.7613097026  | 0.3240848246  | 0.0901802461  |
| C | 2.9375172281  | 1.0003590968  | 0.4735539843  |
| C | 4.1936340262  | 0.3882473048  | 0.5679599470  |
| C | 4.3178452846  | -0.9321092280 | 0.1975313200  |
| C | 0.6998285424  | 1.2976110808  | 0.1035276850  |
| C | 1.3129313801  | 2.5459101852  | 0.3534093729  |
| N | 2.6399639042  | 2.3331088778  | 0.6645190396  |
| C | -0.6997486367 | 1.2976494461  | -0.1035392507 |
| C | -1.3127848721 | 2.5459833016  | -0.3534103202 |

|   |               |               |               |
|---|---------------|---------------|---------------|
| C | -0.6573757029 | 3.7706956177  | -0.2073392518 |
| C | 0.6575875008  | 3.7706587870  | 0.2073490480  |
| C | -1.7612814339 | 0.3241793913  | -0.0902017460 |
| C | -2.9374527585 | 1.0005194004  | -0.4735709984 |
| N | -2.6398285195 | 2.3332552536  | -0.6645227809 |
| C | -1.9094576571 | -1.0008037538 | 0.3832585882  |
| C | -3.1880785627 | -1.5944232815 | 0.2933295870  |
| C | -4.3178824805 | -0.9318791471 | -0.1975691112 |
| C | -4.1936015824 | 0.3884743821  | -0.5679847971 |
| C | -1.0754578363 | -1.9268813194 | 1.0772476141  |
| C | -1.8318334087 | -3.0289760103 | 1.3488715776  |
| N | -3.1011684133 | -2.8469481358 | 0.8587987741  |
| C | 1.0753646270  | -1.9269306493 | -1.0772847729 |
| C | 1.8316861281  | -3.0290561912 | -1.3489342851 |
| N | 3.1010282078  | -2.8471045553 | -0.8588517871 |
| H | 5.0590756519  | 0.9552927251  | 0.9052133730  |
| H | 5.2829961525  | -1.4333071356 | 0.2429077970  |
| H | 3.3323292488  | 3.0617132515  | 0.7352528450  |
| H | -1.1873672485 | 4.7057955543  | -0.3777787307 |
| H | 1.1876291013  | 4.7057289044  | 0.3777964227  |
| H | -3.3321550172 | 3.0618971088  | -0.7352507336 |
| H | -5.2830596061 | -1.4330259150 | -0.2429517552 |
| H | -5.0590130555 | 0.9555685269  | -0.9052336457 |
| H | -0.0363630026 | -1.7933173831 | 1.3440292092  |
| H | -1.5638339705 | -3.9453888103 | 1.8579595068  |
| H | -3.8753252344 | -3.4758844636 | 0.9953951870  |
| H | 0.0362750777  | -1.7933108213 | -1.3440591553 |
| H | 1.5636397255  | -3.9454469140 | -1.8580372376 |
| H | 3.8751510980  | -3.4760816880 | -0.9954524016 |
